# Supplementary material for: A comprehensive look at transcription factor gene expression changes in colorectal adenomas
Source: PubMed Central journal article supplement (PMC4078005; doi:10.1186/1471-2407-14-46), 2014-01-29
Supplement: 1471-2407-14-46-S3.pdf [file 1471-2407-14-46-S3.pdf]

**Supplementary Table 3: Legend of numeric attributes in the MetaCore TF analysis**

|                    |                                                                                                 |
|--------------------|-------------------------------------------------------------------------------------------------|
| <b>Object name</b> | network object name in MetaBase                                                                 |
| <b>Actual</b>      | number of targets in the activated dataset(s) regulated by the chosen transcription factor (TF) |
| <b>n</b>           | number of network objects in the activated dataset(s)                                           |
| <b>R</b>           | number of targets in the complete database or background list regulated by the chosen TF        |
| <b>N</b>           | total number of gene-based objects in the complete database or background list                  |
| <b>Expected</b>    | mean value for hypergeometric distribution ( $n \cdot R / N$ )                                  |
| <b>Ratio</b>       | connectivity ratio (Actual/Expected)                                                            |
| <b>z-score</b>     | z-score $((\text{Actual} - \text{Expected}) / \text{sqrt}(\text{variance}))$                    |
| <b>p-value</b>     | probability to have the given value of Actual or higher (or lower for negative z-score)         |
