# Supplementary material for: A comprehensive look at transcription factor gene expression changes in colorectal adenomas
Source: BMC Cancer. 2014 Jan 29;14:46. doi: 10.1186/1471-2407-14-46 (PMC4078005; doi:10.1186/1471-2407-14-46)
Supplement: Additional file 1: Table S1 — Characteristics of the 17 patients with pedunculated adenomas included in the study. [file 1471-2407-14-46-S1.xls]

## Sheet: NP
Table 1.
Supplementary Table 1. Characteristics of the 17 patients with pedunculated adenomas included in the study.
Patient no.	Colon segment involved	Maximum lesion diameter (mm)	Microscopic appearance	Dysplasia a	No. lesions present b
22	Asc	15	TA	low	2
23	Asc	15	TA	low	2
24	Asc	20	TVA	low	3
25	Asc	15	TVA	high	3
26	Sig	30	TVA	low	51 §
27	Sig	12	TVA	low	3
28	Sig	30	TVA	high	3
29	Sig	20	TVA	low	1
30	Rec	40	TA	low	3
31	Sig	30	TA	low	7
32	Sig	30	TA	low	3
33	Des	20	TA	low	3
34	Sig	30	TA	low	3
35	Sig	15	TVA	low	3
36	Asc	15	TVA	low	1
19	Tra	30	VA	low	3
37	Asc	30	TVA	high	1
Abbreviations: Cec, cecum; Asc, ascending colon; HF, hepatic flexure; Tra, transversum; Des, descending colon; Sig, sigma; Rec, rectum. TA, tubular adenoma; TVA, tubulovillous adenoma; VA, villous adenoma.
a Highest degree of dysplasia in the lesion based on the WHO classification of tumors of the digestive system (Editorial and consensus conference in Lyon, France, November 6-9, 1999 [IARC]).
b Total number of lesions noted during the study colonoscopy, including those used in the present study. §, Patient with suspected attenuated polyposis (the mutational analysis of the APC and MYH genes is currently not available).
