# Supplementary material for: A comprehensive look at transcription factor gene expression changes in colorectal adenomas
Source: BMC Cancer. 2014 Jan 29;14:46. doi: 10.1186/1471-2407-14-46 (PMC4078005; doi:10.1186/1471-2407-14-46)
Supplement: Additional file 2: Table S2 — Differential expression of 1218 TF genes in colorectal adenomas and corresponding normal mucosa samples. Genes are listed in order of ascending p value; bold-face type: 315 genes with a p value <0.01. [file 1471-2407-14-46-S2.xls]

## Sheet: Suppl Table 2
Supplementary Table 2. Differential expression of 1218 TF genes in colorectal adenomas and corresponding normal mucosa samples. Genes are listed in order of ascending p value; bold-face type: 315 genes with a p value <0.01.
Ensembl gene ID	Gene symbol	Fold difference (adenomas/normal mucosa)	p value
ENSG00000116833	NR5A2	-1.4193	8.85294e-16
ENSG00000113580	NR3C1	-0.776604	6.36319e-15
ENSG00000198546	ZNF511	0.669861	7.30607e-12
ENSG00000105976	MET	1.49908	9.56293e-12
ENSG00000142539	SPIB	-1.33295	9.7543e-12
ENSG00000125398	SOX9	0.779926	1.09498e-11
ENSG00000151623	NR3C2	-0.732468	1.28276e-11
ENSG00000136997	MYC	0.948372	1.31741e-11
ENSG00000169554	ZEB2	-0.682873	5.32363e-11
ENSG00000175832	ETV4	1.44002	5.43566e-11
ENSG00000183734	ASCL2	1.06513	7.8298e-11
ENSG00000118526	TCF21	-1.16644	1.87494e-10
ENSG00000163635	ATXN7	-0.433393	2.21431e-10
ENSG00000136826	KLF4	-0.933862	2.73149e-10
ENSG00000177426	TGIF1	0.439885	4.77821e-10
ENSG00000119950	MXI1	-0.635589	6.01458e-10
ENSG00000125968	ID1	0.76613	7.25931e-10
ENSG00000152217	SETBP1	-0.551902	1.01754e-09
ENSG00000155545	MIER3	-1.42119	1.02278e-09
ENSG00000135111	TBX3	0.890546	1.05798e-09
ENSG00000142528	ZNF473	0.426302	1.19403e-09
ENSG00000120149	MSX2	1.6739	1.31299e-09
ENSG00000120693	SMAD9	1.0708	1.4377e-09
ENSG00000141510	TP53	0.773417	2.20815e-09
ENSG00000101076	HNF4A	-0.614027	2.24051e-09
ENSG00000157557	ETS2	0.880673	2.36625e-09
ENSG00000198298	ZNF485	0.396691	2.39796e-09
ENSG00000081189	MEF2C	-0.83475	2.9853e-09
ENSG00000149136	SSRP1	0.486586	3.43369e-09
ENSG00000116604	MEF2D	-0.415502	3.64386e-09
ENSG00000076356	PLXNA2	-0.630877	4.81267e-09
ENSG00000125845	BMP2	-0.486875	8.7301e-09
ENSG00000122778	KIAA1549	0.55867	9.88085e-09
ENSG00000180884	ZNF792	0.476513	1.06379e-08
ENSG00000172819	RARG	0.679221	1.27064e-08
ENSG00000060138	CSDAP1	0.526046	1.75286e-08
ENSG00000067082	KLF6	-0.631114	2.57112e-08
ENSG00000179115	FARSA	0.423489	2.66719e-08
ENSG00000104907	TRMT1	0.527978	2.69774e-08
ENSG00000136040	PLXNC1	-0.722492	2.9548e-08
ENSG00000165659	DACH1	0.926584	3.61667e-08
ENSG00000197905	TEAD4	0.617636	4.85098e-08
ENSG00000100207	TCF20	0.368379	5.16268e-08
ENSG00000116016	EPAS1	-0.613711	6.76306e-08
ENSG00000059728	MXD1	-1.14747	7.40731e-08
ENSG00000102034	ELF4	-0.488396	7.69412e-08
ENSG00000124766	SOX4	0.404656	1.11616e-07
ENSG00000019549	SNAI2	-0.720106	1.55536e-07
ENSG00000112033	PPARD	-0.423264	1.61878e-07
ENSG00000090447	TFAP4	0.442988	1.79855e-07
ENSG00000050344	NFE2L3	1.01951	3.54184e-07
ENSG00000165244	ZNF367	0.459831	3.54349e-07
ENSG00000160007	GRLF1	-0.417234	4.03242e-07
ENSG00000111424	VDR	-0.696971	5.2393e-07
ENSG00000075426	FOSL2	-0.333903	5.26657e-07
ENSG00000198160	MIER1	-0.650267	5.41953e-07
ENSG00000101057	MYBL2	0.908083	5.70751e-07
ENSG00000160967	CUX1	0.296451	6.03188e-07
ENSG00000114554	PLXNA1	0.362312	8.08343e-07
ENSG00000108788	MLX	-0.319562	8.22324e-07
ENSG00000100105	PATZ1	0.334839	1.10185e-06
ENSG00000164379	FOXQ1	0.595591	1.22083e-06
ENSG00000051180	RAD51	0.594954	1.44815e-06
ENSG00000100558	PLEK2	0.801102	1.47878e-06
ENSG00000173473	SMARCC1	0.511961	1.52469e-06
ENSG00000122034	GTF3A	0.558144	1.80476e-06
ENSG00000156650	MYST4	-0.409141	1.87168e-06
ENSG00000171425	ZNF581	0.451797	1.89806e-06
ENSG00000148337	CIZ1	0.315379	1.94161e-06
ENSG00000064490	RFXANK	0.337545	2.00407e-06
ENSG00000101695	RNF125	-0.609178	2.08184e-06
ENSG00000124782	RREB1	-0.207664	2.12444e-06
ENSG00000166261	ZNF202	0.224551	2.17718e-06
ENSG00000171970	ZNF57	-0.383408	2.25924e-06
ENSG00000084676	NCOA1	-0.614428	2.48192e-06
ENSG00000161939	C17orf49	0.508046	2.83732e-06
ENSG00000151702	FLI1	-0.717139	3.24771e-06
ENSG00000164463	C5orf41	-0.536976	3.27852e-06
ENSG00000198554	WDHD1	0.745248	3.55943e-06
ENSG00000083635	NUFIP1	0.643632	3.83197e-06
ENSG00000008441	NFIX	0.313636	4.46869e-06
ENSG00000165891	E2F7	0.435628	5.50761e-06
ENSG00000043039	BARX2	-0.517713	5.74047e-06
ENSG00000164749	HNF4G	-0.78878	5.79561e-06
ENSG00000198807	PAX9	0.615533	6.76564e-06
ENSG00000125952	MAX	-0.352133	7.29476e-06
ENSG00000127337	YEATS4	0.642252	7.37154e-06
ENSG00000156030	C14orf43	-0.35567	7.40426e-06
ENSG00000153048	CARHSP1	0.211681	7.85799e-06
ENSG00000185811	IKZF1	-0.547258	8.11201e-06
ENSG00000175329	ISX	-1.12382	8.77063e-06
ENSG00000213588	ZBTB9	0.397759	9.62078e-06
ENSG00000160685	ZBTB7B	-0.3492	1.00982e-05
ENSG00000101096	NFATC2	-0.407062	1.02483e-05
ENSG00000180787	ZFP3	-0.550143	1.10752e-05
ENSG00000196628	TCF4	-0.496361	1.33317e-05
ENSG00000111206	FOXM1	0.705137	1.37134e-05
ENSG00000178573	MAF	-0.557114	1.39803e-05
ENSG00000187607	ZNF286A	0.468566	1.50317e-05
ENSG00000185238	PRMT3	0.725118	1.5281e-05
ENSG00000148229	POLE3	0.295804	1.54558e-05
ENSG00000124126	PREX1	-0.405115	1.54768e-05
ENSG00000076770	MBNL3	-0.472381	1.67279e-05
ENSG00000187079	TEAD1	0.441683	1.67966e-05
ENSG00000152601	MBNL1	-0.37454	1.97981e-05
ENSG00000180357	ZNF609	-0.190145	2.00571e-05
ENSG00000172493	AFF1	-0.372521	2.30418e-05
ENSG00000185630	PBX1	-0.380489	2.33026e-05
ENSG00000186660	ZFP91	-0.309101	2.7231e-05
ENSG00000124920	C11orf9	0.317834	3.04946e-05
ENSG00000177463	NR2C2	-0.22532	3.3026e-05
ENSG00000162813	BPNT1	-0.377367	3.50887e-05
ENSG00000109787	KLF3	-0.526483	3.73944e-05
ENSG00000118263	KLF7	0.264685	3.80578e-05
ENSG00000179456	ZNF238	0.265579	3.90598e-05
ENSG00000205213	LGR4	-0.584063	3.92115e-05
ENSG00000128016	ZFP36	-0.586658	3.93504e-05
ENSG00000168916	ZNF608	-0.330474	3.95867e-05
ENSG00000161405	IKZF3	-0.756538	4.45304e-05
ENSG00000149016	TUT1	0.205235	4.76297e-05
ENSG00000160199	PKNOX1	0.212003	4.89348e-05
ENSG00000071564	TCF3	0.25809	5.38306e-05
ENSG00000160917	CPSF4	0.247499	5.41358e-05
ENSG00000196950	SLC39A10	0.539235	5.49852e-05
ENSG00000067955	CBFB	0.617143	5.52623e-05
ENSG00000138073	PREB	0.246211	5.80601e-05
ENSG00000197800	ENSG00000197800	-0.387243	5.84592e-05
ENSG00000056277	ZNF280C	0.543948	7.20783e-05
ENSG00000180346	TIGD2	0.551611	7.77769e-05
ENSG00000196391	ZNF774	0.385376	8.67596e-05
ENSG00000106462	EZH2	0.583583	9.29889e-05
ENSG00000140987	ZNF434	0.196685	9.56909e-05
ENSG00000182979	MTA1	0.197306	0.000103329
ENSG00000059378	PARP12	-0.376762	0.000104523
ENSG00000184967	NOC4L	0.353244	0.00010815
ENSG00000196453	ZNF777	0.201337	0.000115733
ENSG00000035499	DEPDC1B	0.42236	0.000116935
ENSG00000169926	KLF13	-0.277598	0.000118096
ENSG00000151090	THRB	-0.69977	0.000136195
ENSG00000068305	MEF2A	-0.292857	0.000137232
ENSG00000078399	HOXA9	0.290251	0.000137707
ENSG00000123095	BHLHE41	-0.399288	0.00013824
ENSG00000117748	RPA2	0.229454	0.00014257
ENSG00000198176	TFDP1	0.268567	0.000159783
ENSG00000188786	MTF1	-0.263268	0.000172871
ENSG00000205250	E2F4	0.231517	0.000180578
ENSG00000130522	JUND	-0.395969	0.000196674
ENSG00000180667	YOD1	-0.195592	0.000198437
ENSG00000141994	DUS3L	0.265443	0.000202139
ENSG00000137834	SMAD6	0.300595	0.0002068
ENSG00000137074	APTX	0.228636	0.000212985
ENSG00000118513	MYB	0.559679	0.000215141
ENSG00000126351	THRA	0.267244	0.000224234
ENSG00000150907	FOXO1	-0.277712	0.000247927
ENSG00000102554	KLF5	-0.278662	0.00025291
ENSG00000215021	PHB2	0.277611	0.000257954
ENSG00000125347	IRF1	-0.387101	0.000265511
ENSG00000083844	ZNF264	-0.312578	0.000310335
ENSG00000171574	ZNF584	0.26221	0.00031112
ENSG00000183431	SF3A3	0.325512	0.000325577
ENSG00000126003	PLAGL2	0.403246	0.000326594
ENSG00000169740	ZNF32	0.475033	0.000326738
ENSG00000213762	ZNF134	-0.500066	0.000331066
ENSG00000137310	ENSG00000137310	0.44099	0.000344959
ENSG00000178951	ZBTB7A	-0.249931	0.000380477
ENSG00000165156	ZHX1	-0.367101	0.000394274
ENSG00000139842	CUL4A	0.359105	0.000394902
ENSG00000151379	MSGN1	0.623752	0.000403293
ENSG00000053254	FOXN3	-0.386703	0.000416929
ENSG00000118922	KLF12	-0.540289	0.000464788
ENSG00000057657	PRDM1	-0.586759	0.000483156
ENSG00000103460	TOX3	-0.356262	0.000485705
ENSG00000183742	MACC1	0.968951	0.000500404
ENSG00000215421	ZNF407	-0.225985	0.000506127
ENSG00000162086	ZNF75A	-0.550168	0.000514161
ENSG00000141030	COPS3	0.305132	0.00051793
ENSG00000141568	FOXK2	0.184548	0.000521884
ENSG00000166147	FBN1	-0.49991	0.000521974
ENSG00000082641	NFE2L1	-0.411634	0.000574146
ENSG00000043514	TRIT1	0.450418	0.000584691
ENSG00000108511	HOXB6	0.605946	0.00058537
ENSG00000133794	ARNTL	-0.55799	0.000586097
ENSG00000140396	NCOA2	-0.381183	0.000606707
ENSG00000116017	ARID3A	0.300253	0.000612297
ENSG00000170448	NFXL1	0.380343	0.00065659
ENSG00000171940	ZNF217	-0.405311	0.000702699
ENSG00000183779	ZNF703	0.307821	0.000705274
ENSG00000112242	E2F3	0.237219	0.00070678
ENSG00000117595	IRF6	-0.366136	0.000720017
ENSG00000171469	ZNF561	0.206994	0.000741081
ENSG00000105556	MIER2	0.20893	0.000746292
ENSG00000083307	GRHL2	0.226711	0.000759833
ENSG00000166704	ZNF606	-0.290406	0.000774451
ENSG00000147789	ZNF7	0.132138	0.000796604
ENSG00000176542	KIAA2018	-0.380944	0.000812432
ENSG00000028310	BRD9	0.150579	0.000860715
ENSG00000006194	ZNF263	0.226795	0.000911758
ENSG00000119919	NKX2-3	-0.326422	0.0009215
ENSG00000069011	PITX1	0.270577	0.000951227
ENSG00000105732	ZNF574	0.195056	0.00098776
ENSG00000105996	HOXA2	-0.397814	0.0010117
ENSG00000108064	TFAM	0.240399	0.00103169
ENSG00000164050	PLXNB1	0.235583	0.00107433
ENSG00000172201	ID4	0.435974	0.0011043
ENSG00000140262	TCF12	0.67232	0.00110781
ENSG00000155506	LARP1	0.285919	0.00111864
ENSG00000150347	ARID5B	0.292368	0.00113375
ENSG00000167562	ZNF701	-0.625616	0.00119231
ENSG00000185650	ZFP36L1	0.369992	0.00121648
ENSG00000198146	ZNF770	0.332101	0.00125542
ENSG00000116990	MYCL1	0.20706	0.00127484
ENSG00000170265	ZNF282	0.208369	0.00129135
ENSG00000171827	ZNF570	-0.370297	0.00130138
ENSG00000119138	KLF9	-0.254263	0.00133944
ENSG00000029993	HMGB3	0.325473	0.00141445
ENSG00000135899	SP110	-0.268295	0.00147347
ENSG00000157514	TSC22D3	-0.286197	0.0014993
ENSG00000115956	PLEK	-0.490414	0.00152371
ENSG00000136451	VEZF1	0.221376	0.00153064
ENSG00000171056	SOX7	0.165234	0.00153931
ENSG00000167635	ZNF146	0.402014	0.00158559
ENSG00000102870	ZNF629	0.187939	0.00160636
ENSG00000185278	ZBTB37	-0.209563	0.0016265
ENSG00000129028	THAP10	0.251597	0.00165801
ENSG00000165655	ZNF503	0.304281	0.00167599
ENSG00000119042	SATB2	-0.427497	0.0016918
ENSG00000159216	RUNX1	0.212492	0.00172002
ENSG00000170325	PRDM10	-0.139854	0.00172496
ENSG00000151612	ZNF827	0.213463	0.00180525
ENSG00000184828	ZBTB7C	-0.334345	0.00181324
ENSG00000100150	DEPDC5	-0.210156	0.00185003
ENSG00000088876	ZNF343	0.186704	0.00185936
ENSG00000115112	TFCP2L1	-0.459019	0.00188056
ENSG00000133884	DPF2	0.267712	0.00188934
ENSG00000196761	ENSG00000196761	0.333871	0.00190813
ENSG00000211899	IGHM	-1.09611	0.00191574
ENSG00000136603	SKIL	0.542169	0.00191739
ENSG00000113716	HMGXB3	0.224824	0.00198232
ENSG00000134107	BHLHE40	0.231933	0.00212109
ENSG00000155090	KLF10	-0.347081	0.00213909
ENSG00000105717	PBX4	0.238735	0.00226685
ENSG00000172845	SP3	-0.124076	0.00229418
ENSG00000176024	ZNF613	-0.391918	0.00234352
ENSG00000109906	ZBTB16	-0.32885	0.0023832
ENSG00000101190	TCFL5	0.156734	0.00241059
ENSG00000134954	ETS1	-0.481701	0.00243608
ENSG00000205683	DPF3	-0.218302	0.00256118
ENSG00000081059	TCF7	0.316078	0.00259548
ENSG00000204519	ZNF551	0.199255	0.00259675
ENSG00000197961	ZNF121	0.529644	0.0027611
ENSG00000179981	TSHZ1	-0.220959	0.00284493
ENSG00000196126	ENSG00000196126	-0.661307	0.00298459
ENSG00000004975	DVL2	0.179264	0.00302731
ENSG00000148737	TCF7L2	-0.306869	0.00329232
ENSG00000168874	ATOH8	0.351509	0.00330248
ENSG00000137492	PRKRIR	0.345769	0.00351909
ENSG00000140548	ZNF710	0.156523	0.00352277
ENSG00000157827	FMNL2	0.296584	0.00352405
ENSG00000084093	REST	0.0923544	0.00354844
ENSG00000166529	ZSCAN21	0.168265	0.00361034
ENSG00000170365	SMAD1	-0.158972	0.00362391
ENSG00000011243	AKAP8L	0.171649	0.00371274
ENSG00000005073	HOXA11	0.249055	0.00384831
ENSG00000067066	SP100	-0.29415	0.00391889
ENSG00000124444	ZNF576	0.128565	0.00402674
ENSG00000163872	YEATS2	0.212675	0.00404292
ENSG00000173575	CHD2	-0.256967	0.00406688
ENSG00000204103	MAFB	-0.255165	0.00412283
ENSG00000198482	ZNF808	-0.376087	0.00418886
ENSG00000198815	FOXJ3	-0.181835	0.00419545
ENSG00000144485	HES6	0.282032	0.00426428
ENSG00000134323	MYCN	0.287183	0.0044906
ENSG00000137309	HMGA1	0.261073	0.0045116
ENSG00000149480	MTA2	0.288987	0.00457939
ENSG00000119574	ZBTB45	0.196175	0.00460384
ENSG00000196670	ZFP62	0.267398	0.00472911
ENSG00000196428	TSC22D2	-0.134367	0.00480989
ENSG00000186350	RXRA	-0.227103	0.00488606
ENSG00000173011	TADA2B	-0.144795	0.00499641
ENSG00000115568	ZNF142	0.134274	0.00505012
ENSG00000182463	TSHZ2	-0.249974	0.00516532
ENSG00000172216	CEBPB	0.221121	0.00521305
ENSG00000116731	PRDM2	-0.143242	0.00525146
ENSG00000172059	KLF11	0.149418	0.00528892
ENSG00000125798	FOXA2	0.346924	0.00548268
ENSG00000141298	SSH2	-0.257111	0.0055405
ENSG00000129173	E2F8	0.349097	0.00561717
ENSG00000134815	DHX34	0.210873	0.0057099
ENSG00000168310	IRF2	-0.212727	0.00575042
ENSG00000171316	CHD7	0.248951	0.0061675
ENSG00000166860	ZBTB39	0.184973	0.00643077
ENSG00000143578	CREB3L4	0.1685	0.00651149
ENSG00000172667	ZMAT3	0.343782	0.00681425
ENSG00000198740	ZNF652	-0.22706	0.00690994
ENSG00000172292	LASS6	0.244068	0.00715965
ENSG00000168883	USP39	0.287509	0.00724268
ENSG00000166949	SMAD3	-0.207493	0.0073694
ENSG00000184481	FOXO4	-0.207189	0.00772285
ENSG00000148187	MRRF	0.29095	0.00773779
ENSG00000167800	TBX10	-0.379792	0.00776739
ENSG00000184357	HIST1H1B	0.710429	0.0080031
ENSG00000170608	FOXA3	0.243998	0.00818277
ENSG00000164078	MST1R	0.283178	0.00819654
ENSG00000177842	ZNF620	0.169073	0.00843091
ENSG00000167625	ZNF526	0.176935	0.00845951
ENSG00000185252	ZNF74	0.217145	0.00845997
ENSG00000161265	U2AF1L4	-0.269684	0.00848704
ENSG00000184939	ZFP90	0.289505	0.00882884
ENSG00000020256	ZFP64	0.0837118	0.00886746
ENSG00000130382	MLLT1	0.195703	0.00917908
ENSG00000134758	RNF138	-0.332153	0.00920569
ENSG00000141027	NCOR1	-0.268118	0.00939161
ENSG00000124795	DEK	0.292694	0.00951733
ENSG00000075975	MKRN2	0.19653	0.00965171
ENSG00000126456	IRF3	0.155732	0.00987261
ENSG00000173875	ZNF791	-0.232823	0.010288
ENSG00000167182	SP2	-0.119471	0.0105419
ENSG00000085276	MECOM	0.23393	0.0106712
ENSG00000171606	ZNF274	-0.0955655	0.0108765
ENSG00000106948	AKNA	-0.213521	0.0108837
ENSG00000196693	ZNF33B	0.379151	0.0109578
ENSG00000180081	ZNF725	-0.229826	0.0112551
ENSG00000015479	SNHG4	0.138371	0.0116487
ENSG00000213096	ZNF254	-0.282793	0.0117229
ENSG00000143390	RFX5	0.274876	0.0127147
ENSG00000116539	ASH1L	-0.2812	0.0129766
ENSG00000197343	ZNF655	-0.252619	0.0131599
ENSG00000158545	ZC3H18	0.125717	0.0136325
ENSG00000196233	LCOR	-0.365229	0.0138406
ENSG00000197265	GTF2E2	0.371022	0.0140393
ENSG00000131759	RARA	-0.214078	0.0142009
ENSG00000022976	ZNF839	0.112797	0.0145102
ENSG00000083828	ZNF586	-0.197335	0.0146633
ENSG00000174282	ZBTB4	0.145551	0.0148264
ENSG00000103495	MAZ	0.180017	0.0148497
ENSG00000198466	ZNF587	0.391686	0.0149042
ENSG00000102984	ZNF821	-0.183597	0.0150703
ENSG00000168610	STAT3	0.253445	0.0153013
ENSG00000142599	RERE	-0.121762	0.0160459
ENSG00000215271	HOMEZ	0.24181	0.0161666
ENSG00000177200	CHD9	-0.321939	0.0162164
ENSG00000141503	MINK1	-0.154521	0.0162252
ENSG00000124151	NCOA3	-0.318748	0.0163121
ENSG00000121417	ZNF211	-0.171147	0.0164527
ENSG00000142396	ENSG00000142396	0.119869	0.0165056
ENSG00000198169	ZNF251	0.118939	0.0167554
ENSG00000100219	XBP1	0.303421	0.0167686
ENSG00000153879	CEBPG	-0.260772	0.0168425
ENSG00000118058	MLL	-0.19033	0.0168519
ENSG00000188994	ZNF292	-0.344849	0.0169482
ENSG00000180035	ZNF48	0.230681	0.0170246
ENSG00000108799	EZH1	-0.272661	0.0170272
ENSG00000130940	CASZ1	-0.130633	0.0172182
ENSG00000166848	TERF2IP	-0.158037	0.017252
ENSG00000124226	RNF114	0.285675	0.0173714
ENSG00000101412	E2F1	0.220978	0.01747
ENSG00000124496	TRERF1	-0.189416	0.0179516
ENSG00000198502	HLA-DRB5	-0.639568	0.0182434
ENSG00000198911	SREBF2	-0.229707	0.0188725
ENSG00000089775	ZBTB25	0.194817	0.0193437
ENSG00000115816	CEBPZ	0.296781	0.0194838
ENSG00000139651	ZNF740	0.138521	0.0206719
ENSG00000127603	MACF1	-0.226646	0.0206977
ENSG00000102878	HSF4	0.248498	0.0207053
ENSG00000128710	HOXD10	-0.555737	0.0211345
ENSG00000141002	TCF25	0.209689	0.0215669
ENSG00000065029	ZNF76	0.100196	0.0217751
ENSG00000173039	RELA	0.204884	0.0220797
ENSG00000101126	ADNP	0.142753	0.0226205
ENSG00000102908	NFAT5	0.248645	0.0236049
ENSG00000105866	SP4	-0.150116	0.0237994
ENSG00000198551	ZNF627	0.245762	0.0242717
ENSG00000060566	CREB3L3	-0.4187	0.024416
ENSG00000177030	DEAF1	0.16868	0.0245585
ENSG00000163159	VPS72	0.216982	0.0250176
ENSG00000182872	RBM10	0.0915003	0.0253812
ENSG00000178917	ZNF852	0.271217	0.0254461
ENSG00000120075	HOXB5	0.313749	0.025519
ENSG00000083842	ZNF8	0.0937373	0.0255229
ENSG00000147124	ZNF41	-0.12886	0.0258923
ENSG00000184445	KNTC1	0.413983	0.0259782
ENSG00000168298	HIST1H1E	0.326243	0.0262958
ENSG00000183495	EP400	0.10683	0.0269699
ENSG00000137273	FOXF2	-0.192807	0.0270975
ENSG00000025293	PHF20	0.197681	0.0272418
ENSG00000152518	ZFP36L2	-0.166488	0.0278229
ENSG00000204569	ENSG00000204569	-0.144622	0.0279736
ENSG00000108509	CAMTA2	-0.129877	0.0280398
ENSG00000107404	DVL1	0.177651	0.0296907
ENSG00000175550	DRAP1	0.145089	0.0298806
ENSG00000171163	ZNF692	0.188151	0.0303454
ENSG00000066136	NFYC	-0.0860803	0.0311215
ENSG00000072364	AFF4	-0.213083	0.0312101
ENSG00000117318	ID3	0.281302	0.0313186
ENSG00000076108	BAZ2A	-0.209113	0.0313537
ENSG00000134852	CLOCK	0.334161	0.0316275
ENSG00000197779	ZNF81	-0.140345	0.0318838
ENSG00000168875	SOX14	0.355728	0.0319195
ENSG00000120738	EGR1	-0.562131	0.0324417
ENSG00000140386	SCAPER	-0.220073	0.0326161
ENSG00000177888	ZBTB41	0.341352	0.0327038
ENSG00000177485	ZBTB33	0.276301	0.0332069
ENSG00000166200	COPS2	0.387295	0.0333551
ENSG00000152804	HHEX	-0.23647	0.0336906
ENSG00000157259	GATAD1	0.172917	0.0350435
ENSG00000105856	HBP1	-0.192012	0.0353377
ENSG00000177425	PAWR	0.200278	0.0364438
ENSG00000177311	ZBTB38	0.202756	0.0372943
ENSG00000143379	SETDB1	0.148275	0.0379728
ENSG00000036549	ZZZ3	0.195157	0.0385509
ENSG00000170631	ZNF16	0.103904	0.0386246
ENSG00000124575	HIST1H1D	0.415868	0.0392178
ENSG00000005889	ZFX	-0.117111	0.039521
ENSG00000185122	HSF1	0.131517	0.0395726
ENSG00000172818	OVOL1	-0.161435	0.0397028
ENSG00000116120	FARSB	0.376484	0.0417022
ENSG00000083168	MYST3	-0.137905	0.0417181
ENSG00000170345	FOS	-0.745263	0.0440621
ENSG00000175727	MLXIP	-0.310988	0.0443939
ENSG00000084112	SSH1	-0.102171	0.0449683
ENSG00000143614	GATAD2B	-0.126057	0.0453376
ENSG00000038219	BOD1L	-0.195796	0.0456846
ENSG00000177606	JUN	0.212948	0.0466177
ENSG00000135100	HNF1A	0.170453	0.0474341
ENSG00000104881	PPP1R13L	0.183874	0.0474666
ENSG00000105750	ZNF85	-0.137746	0.049675
ENSG00000147862	NFIB	-0.225051	0.0503996
ENSG00000130818	ZNF426	0.231353	0.0504327
ENSG00000158290	CUL4B	0.205912	0.0508144
ENSG00000010539	ZNF200	0.100754	0.0514671
ENSG00000198839	ZNF277	0.365821	0.0535111
ENSG00000119866	BCL11A	0.136429	0.0538422
ENSG00000130803	ZNF317	0.139058	0.0539473
ENSG00000186951	PPARA	-0.109552	0.0544126
ENSG00000164104	HMGB2	0.168213	0.0545019
ENSG00000074219	TEAD2	0.229432	0.0546062
ENSG00000081721	DUSP12	0.10146	0.0546356
ENSG00000106459	NRF1	-0.0750441	0.0551364
ENSG00000174738	NR1D2	-0.277883	0.055901
ENSG00000197162	ZNF785	0.158868	0.056647
ENSG00000090661	LASS4	-0.197523	0.0570494
ENSG00000183309	ZNF623	-0.224754	0.0584495
ENSG00000129911	KLF16	0.176356	0.0595413
ENSG00000077150	NFKB2	0.131852	0.059822
ENSG00000132967	ENSG00000132967	0.244876	0.0603824
ENSG00000169136	ATF5	0.128215	0.0605608
ENSG00000065548	ZC3H15	0.247254	0.0606965
ENSG00000182938	OTOP3	-0.223743	0.0609732
ENSG00000197921	HES5	0.175888	0.0611781
ENSG00000176842	IRX5	0.258972	0.0616105
ENSG00000204576	ENSG00000204576	0.106695	0.0619872
ENSG00000096401	CDC5L	0.291801	0.0633562
ENSG00000166716	ZNF592	-0.133983	0.0637822
ENSG00000160113	NR2F6	-0.154246	0.064115
ENSG00000128604	IRF5	-0.146694	0.0643595
ENSG00000131127	ZNF141	-0.226722	0.0661774
ENSG00000126561	STAT5A	0.182228	0.0663918
ENSG00000101544	ADNP2	0.17997	0.0668279
ENSG00000167962	ZNF598	0.147492	0.0681489
ENSG00000143157	POGK	0.1695	0.0685702
ENSG00000107929	LARP4B	0.129929	0.0699509
ENSG00000188283	ZNF383	-0.269754	0.0700212
ENSG00000178691	SUZ12	0.29371	0.0712724
ENSG00000180964	TCEAL8	0.165034	0.071284
ENSG00000095951	HIVEP1	-0.218081	0.0716311
ENSG00000106261	ZKSCAN1	0.19673	0.0721363
ENSG00000143437	ARNT	-0.103812	0.072306
ENSG00000128645	HOXD1	-0.255194	0.072348
ENSG00000198464	ZNF480	0.222814	0.0734784
ENSG00000165684	SNAPC4	0.144362	0.0741308
ENSG00000198429	ZNF69	0.21843	0.0752459
ENSG00000162664	ZNF326	-0.290158	0.0764002
ENSG00000196498	NCOR2	0.136331	0.0783042
ENSG00000122386	ZNF205	0.16367	0.0789202
ENSG00000185219	ZNF445	0.10563	0.0794082
ENSG00000117625	RCOR3	-0.117467	0.0796432
ENSG00000125846	ZNF133	0.123514	0.0798054
ENSG00000137166	FOXP4	0.12495	0.0798545
ENSG00000198846	TOX	-0.238946	0.0801333
ENSG00000100426	ZBED4	0.113858	0.0803864
ENSG00000072121	ZFYVE26	-0.109304	0.0808611
ENSG00000204517	ENSG00000204517	0.159385	0.0819067
ENSG00000172830	SSH3	0.102861	0.081998
ENSG00000086504	MRPL28	0.106644	0.0827383
ENSG00000178096	BOLA1	0.140021	0.0831435
ENSG00000081665	ZNF506	-0.254888	0.083569
ENSG00000135457	TFCP2	0.233284	0.0854843
ENSG00000168286	THAP11	0.099962	0.0875691
ENSG00000168214	RBPJ	0.0597747	0.0877049
ENSG00000138795	LEF1	0.33397	0.0892473
ENSG00000129534	C14orf106	0.295398	0.0901349
ENSG00000198153	ZNF737	-0.279515	0.0911452
ENSG00000177352	CCDC71	0.0650481	0.0918702
ENSG00000132846	ZBED3	0.109304	0.0921982
ENSG00000102901	CENPT	0.118879	0.0922402
ENSG00000107807	TLX1	0.303942	0.0925527
ENSG00000139515	PDX1	0.213643	0.0933501
ENSG00000177508	IRX3	0.241752	0.093538
ENSG00000113658	SMAD5	0.190393	0.0935687
ENSG00000140479	PCSK6	-0.152882	0.0942069
ENSG00000187792	ZNF70	0.111658	0.0945834
ENSG00000158711	ELK4	-0.111087	0.0948772
ENSG00000126767	ELK1	0.137632	0.096031
ENSG00000163516	ANKZF1	0.110853	0.0964578
ENSG00000166526	ZNF3	0.138865	0.0966648
ENSG00000173153	ESRRA	-0.130359	0.0967017
ENSG00000100281	HMGXB4	0.140153	0.0969811
ENSG00000104897	SF3A2	0.161744	0.0974419
ENSG00000120087	HOXB7	0.120826	0.098043
ENSG00000163013	FBXO41	0.160088	0.0982846
ENSG00000100319	ZMAT5	0.131645	0.0984577
ENSG00000177700	POLR2L	0.124545	0.0986064
ENSG00000177045	SIX5	0.176815	0.0997646
ENSG00000176248	ANAPC2	0.125462	0.0999094
ENSG00000105722	ERF	0.151622	0.100464
ENSG00000196757	ZNF700	-0.167015	0.103523
ENSG00000116580	GON4L	-0.0844497	0.103917
ENSG00000171467	ZNF318	0.123672	0.106338
ENSG00000135164	DMTF1	-0.305479	0.107773
ENSG00000121413	ZSCAN18	-0.149874	0.108148
ENSG00000065978	YBX1	0.0840376	0.11028
ENSG00000100146	SOX10	-0.147219	0.112044
ENSG00000125740	FOSB	-0.354584	0.112601
ENSG00000198824	ZNF828	0.121529	0.113148
ENSG00000144026	ZNF514	0.112083	0.113712
ENSG00000164532	TBX20	0.156303	0.117342
ENSG00000105516	DBP	-0.146843	0.117574
ENSG00000197576	HOXA4	-0.120178	0.118817
ENSG00000139793	MBNL2	0.140966	0.11908
ENSG00000197951	ZNF71	0.114824	0.123405
ENSG00000172888	ZNF621	0.093226	0.124073
ENSG00000064961	HMG20B	0.1339	0.127837
ENSG00000205189	ZBTB10	-0.184878	0.129304
ENSG00000106511	MEOX2	-0.128695	0.13013
ENSG00000160062	ZBTB8A	0.129024	0.130502
ENSG00000184517	ZFP1	0.130104	0.131538
ENSG00000163132	MSX1	0.163439	0.134061
ENSG00000173894	CBX2	0.157951	0.134155
ENSG00000178982	EIF3K	0.119738	0.135035
ENSG00000196652	ZKSCAN5	0.0762727	0.135036
ENSG00000183474	GTF2H2C	0.23881	0.135212
ENSG00000198265	HELZ	-0.161592	0.135779
ENSG00000143442	POGZ	-0.0932965	0.137682
ENSG00000140044	JDP2	-0.101128	0.139522
ENSG00000186564	FOXD2	-0.167511	0.139816
ENSG00000140968	IRF8	-0.245361	0.140774
ENSG00000112561	TFEB	-0.110067	0.141316
ENSG00000133606	MKRN9P	-0.078712	0.141512
ENSG00000189120	SP6	0.178104	0.142546
ENSG00000113722	CDX1	-0.0955341	0.14342
ENSG00000117036	ETV3	-0.094877	0.145665
ENSG00000099326	MZF1	0.0982983	0.14774
ENSG00000196214	ZNF766	0.207329	0.147768
ENSG00000130589	ENSG00000130589	0.12074	0.149588
ENSG00000125651	GTF2F1	0.0937253	0.151105
ENSG00000103343	ZNF174	0.0915632	0.152861
ENSG00000185022	MAFF	0.150698	0.154687
ENSG00000120837	NFYB	0.187381	0.156352
ENSG00000115020	PIKFYVE	-0.167865	0.156506
ENSG00000135547	HEY2	-0.132051	0.15676
ENSG00000140470	ADAMTS17	-0.125512	0.157378
ENSG00000139624	LASS5	0.127448	0.15774
ENSG00000170653	ATF7	0.0952192	0.158223
ENSG00000120963	ZNF706	0.119829	0.158781
ENSG00000125817	CENPB	0.0906602	0.158841
ENSG00000197701	ZNF595	-0.1398	0.161478
ENSG00000096654	ZNF184	0.159294	0.161546
ENSG00000111269	CREBL2	-0.0953487	0.161683
ENSG00000148200	NR6A1	-0.0992592	0.163089
ENSG00000188785	ZNF548	-0.0869623	0.164818
ENSG00000104064	GABPB1	0.187898	0.166168
ENSG00000135373	EHF	0.198271	0.166895
ENSG00000167491	GATAD2A	0.0647709	0.167978
ENSG00000162714	ZNF496	0.0832665	0.168079
ENSG00000103241	FOXF1	-0.13785	0.171638
ENSG00000128000	ZNF780B	-0.200127	0.171761
ENSG00000001167	NFYA	0.112064	0.171979
ENSG00000124613	ZNF391	0.122817	0.172389
ENSG00000115350	POLE4	0.105438	0.173422
ENSG00000204335	SP5	0.18138	0.174158
ENSG00000004399	PLXND1	0.0770674	0.175058
ENSG00000175105	ZNF654	-0.216358	0.176245
ENSG00000197714	ZNF460	0.118049	0.178897
ENSG00000175213	ZNF408	0.062308	0.179046
ENSG00000055609	MLL3	-0.190394	0.179154
ENSG00000155792	DEPDC6	0.205834	0.181286
ENSG00000197170	PSMD12	0.180076	0.181309
ENSG00000007545	CRAMP1L	0.0762901	0.182553
ENSG00000086102	NFX1	0.147877	0.184861
ENSG00000115966	ATF2	-0.137126	0.186893
ENSG00000011451	WIZ	0.123176	0.18751
ENSG00000213020	ZNF611	-0.195542	0.187908
ENSG00000114861	FOXP1	-0.0891777	0.189157
ENSG00000180610	ZBTB12B	-0.117668	0.189953
ENSG00000025434	NR1H3	-0.102717	0.19167
ENSG00000197362	ZNF786	0.0783086	0.191816
ENSG00000172466	ZNF24	-0.12688	0.192354
ENSG00000107249	GLIS3	0.10819	0.194108
ENSG00000105663	ENSG00000105663	0.0821309	0.195114
ENSG00000166888	STAT6	0.11865	0.198803
ENSG00000142409	ZNF787	0.0902073	0.199907
ENSG00000170581	STAT2	-0.155567	0.202436
ENSG00000103449	SALL1	-0.0791477	0.203192
ENSG00000158773	USF1	-0.122767	0.20566
ENSG00000213676	ATF6B	0.0865098	0.209907
ENSG00000154832	CXXC1	0.0693639	0.212779
ENSG00000153234	NR4A2	-0.167997	0.212786
ENSG00000079337	RAPGEF3	0.115466	0.213305
ENSG00000143418	LASS2	0.0931246	0.215655
ENSG00000083838	ZNF446	0.126325	0.216104
ENSG00000172262	ZNF131	0.0709876	0.217496
ENSG00000152284	TCF7L1	-0.111506	0.219486
ENSG00000108671	PSMD11	0.134716	0.220607
ENSG00000110171	TRIM3	-0.0713045	0.22327
ENSG00000170322	NFRKB	0.0640696	0.232723
ENSG00000146618	FERD3L	0.173965	0.235806
ENSG00000131196	NFATC1	-0.110537	0.237112
ENSG00000070476	ZXDC	0.0496349	0.237954
ENSG00000120690	ELF1	-0.142029	0.238691
ENSG00000177873	ZNF619	0.0804829	0.238833
ENSG00000196152	ZNF79	0.0560251	0.239492
ENSG00000106031	HOXA13	0.170165	0.239887
ENSG00000162599	NFIA	0.0939257	0.239948
ENSG00000143842	SOX13	-0.0803389	0.240246
ENSG00000127483	HP1BP3	-0.134183	0.242068
ENSG00000117000	RLF	-0.176839	0.24261
ENSG00000165702	GFI1B	-0.109141	0.24441
ENSG00000196812	ZSCAN16	0.12233	0.245468
ENSG00000146587	RBAK	0.110945	0.245509
ENSG00000055130	CUL1	0.155802	0.247233
ENSG00000115738	ID2	-0.0930349	0.247782
ENSG00000161642	ZNF385A	-0.142524	0.248392
ENSG00000108264	TADA2A	0.13133	0.249976
ENSG00000204946	ZNF783	0.0888066	0.250264
ENSG00000158805	ZNF276	0.0758947	0.253156
ENSG00000169981	ZNF35	0.13441	0.253197
ENSG00000007866	TEAD3	-0.0702147	0.25422
ENSG00000135365	PHF21A	-0.0841128	0.25492
ENSG00000083223	ZCCHC6	-0.17221	0.256913
ENSG00000171295	ZNF440	-0.173748	0.257717
ENSG00000197024	ZNF398	0.058461	0.257741
ENSG00000167384	ZNF180	-0.0671651	0.258386
ENSG00000111145	ELK3	0.093591	0.258947
ENSG00000130518	KIAA1683	-0.178489	0.259292
ENSG00000049768	FOXP3	0.119622	0.261681
ENSG00000135870	RC3H1	-0.11485	0.263514
ENSG00000176723	ZNF843	0.145998	0.264563
ENSG00000083817	ZNF416	0.080067	0.264662
ENSG00000157933	SKI	0.0636558	0.265402
ENSG00000136237	RAPGEF5	-0.144189	0.265883
ENSG00000143067	ZNF697	0.0958152	0.267284
ENSG00000079432	CIC	0.0687106	0.267887
ENSG00000181827	RFX7	0.11301	0.271641
ENSG00000140632	GLYR1	-0.0649045	0.271876
ENSG00000100968	NFATC4	0.10983	0.273267
ENSG00000106038	EVX1	0.124252	0.27389
ENSG00000167771	RCOR2	0.114833	0.273971
ENSG00000121068	TBX2	-0.111147	0.274699
ENSG00000105559	PLEKHA4	0.0959946	0.274976
ENSG00000058673	ZC3H11A	-0.159212	0.275267
ENSG00000170802	FOXN2	-0.135076	0.275668
ENSG00000104856	RELB	-0.0836862	0.277599
ENSG00000123933	MXD4	-0.0651035	0.283908
ENSG00000102302	FGD1	-0.103137	0.2848
ENSG00000014164	ZC3H3	0.0497647	0.286064
ENSG00000132478	UNK	0.0442079	0.286501
ENSG00000110851	PRDM4	0.0613904	0.287114
ENSG00000103510	MYST1	0.0742183	0.287925
ENSG00000072310	SREBF1	0.0779601	0.288092
ENSG00000124256	ZBP1	-0.100675	0.296274
ENSG00000176399	DMRTA1	-0.12512	0.296912
ENSG00000156853	ZNF689	0.0658218	0.297589
ENSG00000106331	PAX4	-0.0884569	0.298022
ENSG00000048405	ZNF800	0.0400784	0.298445
ENSG00000172379	ARNT2	0.114201	0.299415
ENSG00000161914	ZNF653	0.079438	0.299923
ENSG00000163909	HEYL	0.110958	0.300349
ENSG00000114126	TFDP2	-0.0832285	0.300414
ENSG00000175745	NR2F1	-0.096984	0.300984
ENSG00000071655	MBD3	0.0910101	0.302827
ENSG00000153922	CHD1	-0.175309	0.305036
ENSG00000009950	MLXIPL	0.0965502	0.307134
ENSG00000153560	UBP1	-0.0550597	0.309499
ENSG00000135482	ZC3H10	0.0648816	0.310953
ENSG00000186130	ZBTB6	-0.0880423	0.312927
ENSG00000130749	ZC3H4	0.0539042	0.313794
ENSG00000173404	INSM1	-0.103342	0.315414
ENSG00000004534	RBM6	-0.140707	0.322496
ENSG00000164620	RELL2	0.121755	0.32339
ENSG00000057935	MTA3	0.0434367	0.326868
ENSG00000163795	ZNF513	-0.0636975	0.333158
ENSG00000102804	TSC22D1	-0.0788557	0.333495
ENSG00000142700	DMRTA2	0.102451	0.338121
ENSG00000163848	ZNF148	-0.0906677	0.338618
ENSG00000182318	ZSCAN22	0.0628649	0.339039
ENSG00000129514	FOXA1	0.0796485	0.33971
ENSG00000179348	GATA2	0.097659	0.340421
ENSG00000092203	TOX4	-0.094292	0.350384
ENSG00000213347	MXD3	0.0897172	0.352023
ENSG00000181472	ZBTB2	0.0869804	0.354334
ENSG00000140836	ZFHX3	0.0657848	0.354479
ENSG00000066336	SPI1	-0.1091	0.358027
ENSG00000138663	COPS4	0.0974742	0.358982
ENSG00000183340	JRKL	0.114668	0.361783
ENSG00000166173	LARP6	-0.0931538	0.361918
ENSG00000136770	DNAJC1	-0.0782568	0.36199
ENSG00000153147	SMARCA5	0.13277	0.362473
ENSG00000139613	SMARCC2	0.0480785	0.364944
ENSG00000165643	SOHLH1	0.116444	0.366271
ENSG00000162702	ZNF281	-0.0386515	0.366605
ENSG00000182158	CREB3L2	-0.0803398	0.369294
ENSG00000167393	PPP2R3B	0.0991486	0.371354
ENSG00000125945	ZNF436	-0.0508833	0.373427
ENSG00000168348	INSM2	0.117798	0.376758
ENSG00000171443	ZNF524	0.0992755	0.380955
ENSG00000181638	ZFP41	0.0716613	0.382665
ENSG00000181965	NEUROG1	0.107246	0.385447
ENSG00000128272	ATF4	0.0473295	0.385504
ENSG00000164916	FOXK1	0.0759734	0.38656
ENSG00000176472	ZNF575	-0.109187	0.386828
ENSG00000003756	RBM5	-0.0991815	0.386956
ENSG00000188290	HES4	0.101003	0.389564
ENSG00000164736	SOX17	0.107323	0.390632
ENSG00000108094	CUL2	0.125458	0.391484
ENSG00000116044	NFE2L2	-0.083186	0.394045
ENSG00000185155	MIXL1	-0.076912	0.394379
ENSG00000125850	OVOL2	0.0639383	0.394506
ENSG00000188095	MESP2	0.111468	0.394875
ENSG00000172238	ATOH1	0.178238	0.397618
ENSG00000163170	BOLA3	0.0396986	0.3984
ENSG00000172273	HINFP	-0.0515356	0.398616
ENSG00000182909	LENG9	0.0820899	0.3988
ENSG00000187821	HELT	-0.0972654	0.39893
ENSG00000160973	FOXH1	0.127039	0.400664
ENSG00000127481	UBR4	-0.0788012	0.400902
ENSG00000123685	BATF3	-0.055274	0.401893
ENSG00000161813	LARP4	0.110849	0.402728
ENSG00000162601	MYSM1	-0.120819	0.403334
ENSG00000107175	CREB3	0.0550447	0.403341
ENSG00000213015	ZNF580	0.0975885	0.40375
ENSG00000132130	LHX1	0.0895549	0.40384
ENSG00000157613	CREB3L1	0.11902	0.403847
ENSG00000166925	TSC22D4	-0.0608402	0.404868
ENSG00000147601	TERF1	0.133972	0.405628
ENSG00000075292	ZNF638	-0.105162	0.409432
ENSG00000005513	SOX8	0.0881993	0.41015
ENSG00000171843	MLLT3	0.10536	0.411447
ENSG00000123200	ZC3H13	-0.0574706	0.41234
ENSG00000203485	INF2	0.046313	0.415555
ENSG00000134744	ZCCHC11	-0.0702796	0.416448
ENSG00000132773	TOE1	-0.0464187	0.420529
ENSG00000197063	MAFG	0.0344718	0.421568
ENSG00000115415	STAT1	-0.112912	0.422061
ENSG00000007968	E2F2	-0.0622961	0.42477
ENSG00000156983	BRPF1	0.0267466	0.430705
ENSG00000139746	RBM26	0.0681467	0.43376
ENSG00000139083	ETV6	0.0865344	0.436243
ENSG00000167548	MLL2	-0.0420899	0.437758
ENSG00000185591	SP1	-0.057453	0.438252
ENSG00000126746	ZNF384	0.0358516	0.439678
ENSG00000181894	ZNF329	-0.0595867	0.440249
ENSG00000052850	ALX4	0.0911634	0.443834
ENSG00000189060	H1F0	0.106284	0.444507
ENSG00000136936	XPA	-0.0772253	0.446443
ENSG00000103994	ZFP106	-0.0638291	0.44729
ENSG00000118260	CREB1	-0.0755176	0.449421
ENSG00000176946	THAP4	0.0501917	0.451648
ENSG00000129194	SOX15	0.116134	0.453321
ENSG00000072736	NFATC3	-0.0594697	0.454108
ENSG00000127528	KLF2	-0.0826089	0.454952
ENSG00000188662	HILS1	0.102146	0.456125
ENSG00000130182	ZSCAN10	0.0842533	0.459962
ENSG00000170561	IRX2	0.0758135	0.461306
ENSG00000126464	PRR12	0.0481499	0.462384
ENSG00000163659	TIPARP	-0.0609912	0.462557
ENSG00000170577	SIX2	0.108648	0.462876
ENSG00000161551	ZNF577	-0.0613983	0.467456
ENSG00000136630	HLX	-0.0801314	0.468795
ENSG00000137504	CREBZF	0.097901	0.47206
ENSG00000130675	MNX1	0.0507175	0.4727
ENSG00000124201	ZNFX1	-0.0579933	0.472828
ENSG00000073861	TBX21	-0.0904658	0.473653
ENSG00000105997	HOXA3	-0.0708644	0.473994
ENSG00000175387	SMAD2	0.0784118	0.474442
ENSG00000148143	ZNF462	0.0477175	0.475982
ENSG00000131381	ZFYVE20	0.0403091	0.476092
ENSG00000176293	ZNF135	-0.0849381	0.476327
ENSG00000180535	BHLHA15	-0.0643842	0.476823
ENSG00000198517	MAFK	-0.0448614	0.478003
ENSG00000070444	MNT	0.0538842	0.478547
ENSG00000160094	ZNF362	0.0479396	0.479812
ENSG00000010818	HIVEP2	-0.0940135	0.480702
ENSG00000124203	ZNF831	-0.0708042	0.483328
ENSG00000010030	ETV7	0.0551449	0.485782
ENSG00000105698	USF2	-0.0445813	0.486789
ENSG00000164684	ZNF704	0.0670034	0.487345
ENSG00000197782	ZNF780A	-0.0796062	0.489538
ENSG00000167685	ZNF444	0.0787771	0.491201
ENSG00000196646	ZNF136	-0.0701382	0.491798
ENSG00000142025	DMRTC2	0.09663	0.492088
ENSG00000197933	ZNF823	-0.0870544	0.492996
ENSG00000130684	ZNF337	0.0636518	0.496147
ENSG00000141448	GATA6	0.0489663	0.49629
ENSG00000161277	THAP8	0.0788435	0.496756
ENSG00000196267	ZNF836	0.0506573	0.498272
ENSG00000114853	ZBTB47	0.0674071	0.499091
ENSG00000073584	SMARCE1	-0.038884	0.499116
ENSG00000115507	OTX1	0.0773202	0.500123
ENSG00000036257	CUL3	-0.0860451	0.503335
ENSG00000165804	ZNF219	0.0551669	0.506151
ENSG00000188620	HMX3	0.0857813	0.506869
ENSG00000175592	FOSL1	0.080828	0.506896
ENSG00000172346	CSDC2	0.0944453	0.507674
ENSG00000078140	UBE2K	-0.0538114	0.508759
ENSG00000143867	OSR1	-0.0876099	0.510666
ENSG00000134046	MBD2	-0.0437005	0.511414
ENSG00000179588	ZFPM1	0.0830755	0.511621
ENSG00000134438	RAX	0.0884718	0.511752
ENSG00000157657	ZNF618	-0.0584618	0.513038
ENSG00000179455	MKRN3	0.0906863	0.513922
ENSG00000169957	ZNF768	-0.0429434	0.514307
ENSG00000183072	NKX2-5	-0.0637698	0.516422
ENSG00000124177	CHD6	0.0547015	0.521888
ENSG00000180053	NKX2-6	-0.0873219	0.524735
ENSG00000056097	ZFR	0.0712568	0.525654
ENSG00000129071	MBD4	-0.090477	0.525817
ENSG00000164651	SP8	0.0702125	0.527708
ENSG00000141646	SMAD4	-0.0548585	0.528265
ENSG00000011332	DPF1	0.0861694	0.528729
ENSG00000141956	PRDM15	0.0381027	0.529674
ENSG00000196466	ZNF799	0.0430436	0.529767
ENSG00000167766	ZNF83	-0.113937	0.530362
ENSG00000125285	SOX21	0.0824718	0.532777
ENSG00000175325	PROP1	0.104586	0.533682
ENSG00000168062	BATF2	0.0467608	0.533806
ENSG00000169856	ONECUT1	0.0660147	0.534317
ENSG00000006377	DLX6	0.0589464	0.535702
ENSG00000149922	TBX6	0.0721914	0.5358
ENSG00000198205	ZXDA	0.080415	0.53617
ENSG00000171786	NHLH1	-0.0537776	0.540547
ENSG00000213928	IRF9	-0.0755551	0.541842
ENSG00000214513	NOTO	0.0659562	0.542276
ENSG00000171161	ZNF672	-0.0295676	0.543661
ENSG00000140382	HMG20A	0.0637114	0.544656
ENSG00000152443	ZNF776	-0.0745252	0.545706
ENSG00000204231	RXRB	0.0307931	0.54762
ENSG00000074047	GLI2	-0.0592185	0.548083
ENSG00000163435	ELF3	-0.0468077	0.553254
ENSG00000127152	BCL11B	0.0454534	0.556431
ENSG00000102974	CTCF	0.0443119	0.556436
ENSG00000010244	ZNF207	0.0629651	0.557914
ENSG00000198816	ZNF358	0.0405201	0.558335
ENSG00000130856	ZNF236	0.0271324	0.55966
ENSG00000197363	ZNF517	-0.0616302	0.560119
ENSG00000163792	TCF23	-0.0897869	0.560216
ENSG00000124232	RBPJL	0.066166	0.563137
ENSG00000164853	UNCX	-0.0608904	0.563349
ENSG00000095574	IKZF5	-0.0562242	0.564694
ENSG00000182968	SOX1	0.0590699	0.564729
ENSG00000184897	H1FX	0.0466038	0.565114
ENSG00000177732	SOX12	0.069542	0.566706
ENSG00000147421	HMBOX1	-0.0513126	0.56743
ENSG00000132005	RFX1	0.0450055	0.568832
ENSG00000130827	PLXNA3	0.0474014	0.569523
ENSG00000129535	NRL	0.0728489	0.570083
ENSG00000131115	ZNF227	0.0526275	0.571026
ENSG00000170260	ZNF212	0.0361298	0.571495
ENSG00000152467	ZSCAN1	0.0729284	0.571538
ENSG00000159905	ZNF234	0.0558641	0.573927
ENSG00000196922	ZNF252	-0.0611057	0.57533
ENSG00000197302	ZNF720	0.0548247	0.57586
ENSG00000136504	MYST2	-0.0557329	0.576123
ENSG00000163508	EOMES	-0.0527992	0.576279
ENSG00000119614	VSX2	0.0730311	0.57736
ENSG00000213801	ENSG00000213801	-0.0596886	0.580008
ENSG00000143032	BARHL2	0.0773602	0.580183
ENSG00000164778	EN2	0.0695322	0.581349
ENSG00000198315	ZNF192	-0.0634473	0.58192
ENSG00000125520	SLC2A4RG	0.0512649	0.582432
ENSG00000214336	FOXI3	0.0686895	0.584534
ENSG00000176182	MYPOP	0.0612901	0.586193
ENSG00000006047	YBX2	-0.0544401	0.587791
ENSG00000179277	MEIS3P1	0.0693376	0.588771
ENSG00000114439	BBX	-0.0489915	0.589108
ENSG00000164900	GBX1	0.0758961	0.590312
ENSG00000170684	ZNF296	0.0527147	0.591153
ENSG00000131408	NR1H2	-0.0289822	0.594165
ENSG00000058729	RIOK2	0.0841911	0.594783
ENSG00000119725	ZNF410	0.0764411	0.596456
ENSG00000172977	KAT5	0.0383579	0.596751
ENSG00000158717	RNF166	-0.0431603	0.599296
ENSG00000104885	DOT1L	-0.0317982	0.59967
ENSG00000174652	ZNF266	0.0718521	0.601954
ENSG00000168269	FOXI1	0.0647679	0.603341
ENSG00000118689	FOXO3	-0.0501009	0.60386
ENSG00000188070	C11orf95	0.052606	0.60731
ENSG00000165556	CDX2	0.0486911	0.607479
ENSG00000066422	ZBTB11	-0.0713918	0.608297
ENSG00000170485	NPAS2	-0.0294101	0.608549
ENSG00000185670	ZBTB3	0.0327641	0.609528
ENSG00000197177	GPR123	0.066719	0.610343
ENSG00000163958	ZDHHC19	0.0600547	0.610882
ENSG00000168505	GBX2	0.0706862	0.611133
ENSG00000105278	ZFR2	0.0587142	0.611758
ENSG00000083642	PDS5B	-0.0512709	0.611834
ENSG00000166454	ATMIN	-0.0371645	0.612556
ENSG00000167157	PRRX2	0.0627876	0.617143
ENSG00000086589	RBM22	-0.0697663	0.61787
ENSG00000105879	CBLL1	0.0510206	0.619374
ENSG00000198455	ZXDB	0.0729907	0.620482
ENSG00000170616	SCRT1	0.0609146	0.621249
ENSG00000188033	ZNF490	-0.0335389	0.62149
ENSG00000168267	PTF1A	-0.0472937	0.622412
ENSG00000143365	RORC	0.0395053	0.623755
ENSG00000183770	FOXL2	-0.0657757	0.62421
ENSG00000188816	HMX2	0.0648251	0.625627
ENSG00000217236	SP9	-0.0447501	0.629189
ENSG00000131061	ZNF341	-0.0376795	0.630296
ENSG00000108312	UBTF	-0.0185657	0.630606
ENSG00000136870	ZNF189	0.0709853	0.63116
ENSG00000204859	ZBTB48	-0.0407362	0.631453
ENSG00000100625	SIX4	-0.0503034	0.633314
ENSG00000189079	ARID2	-0.0552912	0.633359
ENSG00000107859	PITX3	0.0632286	0.634403
ENSG00000186566	GPATCH8	0.0381628	0.634588
ENSG00000122299	ZC3H7A	-0.0611985	0.642179
ENSG00000114315	HES1	-0.0348611	0.64247
ENSG00000204278	ENSG00000204278	0.0533111	0.645664
ENSG00000204612	FOXB2	0.0522211	0.647203
ENSG00000109685	WHSC1	0.0190925	0.648216
ENSG00000125813	PAX1	0.056406	0.648262
ENSG00000089335	ZNF302	0.0472136	0.649065
ENSG00000076344	RGS11	0.0499696	0.65077
ENSG00000139800	ZIC5	0.0480084	0.651457
ENSG00000182759	MAFA	0.0493291	0.652504
ENSG00000198538	ZNF28	0.0430313	0.653513
ENSG00000215474	SKOR2	0.0510198	0.654096
ENSG00000111249	CUX2	0.0461135	0.657019
ENSG00000028277	POU2F2	-0.0494299	0.657541
ENSG00000185669	SNAI3	-0.0422141	0.658099
ENSG00000113430	IRX4	0.0575111	0.658108
ENSG00000178919	FOXE1	0.0587608	0.662136
ENSG00000107223	EDF1	-0.0266096	0.664013
ENSG00000125533	BHLHE23	0.0602242	0.665009
ENSG00000124191	TOX2	-0.0460445	0.66567
ENSG00000061455	PRDM6	-0.0413326	0.666602
ENSG00000185044	ENSG00000185044	-0.0360625	0.668849
ENSG00000152475	ZNF837	0.052081	0.669729
ENSG00000218891	ZNF579	0.053689	0.670243
ENSG00000181315	ZNF322A	-0.0768526	0.674335
ENSG00000187837	HIST1H1C	0.0663838	0.676189
ENSG00000164458	TRUE	-0.0311531	0.676762
ENSG00000168826	ZBTB49	-0.0191552	0.678601
ENSG00000131931	THAP1	-0.0360363	0.679433
ENSG00000162761	LMX1A	-0.0477483	0.680928
ENSG00000186272	ZNF17	-0.0257025	0.682619
ENSG00000196092	PAX5	-0.0470604	0.682722
ENSG00000171223	JUNB	-0.0547405	0.682746
ENSG00000153207	AHCTF1	0.0199372	0.683008
ENSG00000164438	TLX3	0.060785	0.683463
ENSG00000163623	NKX6-1	0.0449015	0.687467
ENSG00000121486	C1orf25	-0.0440856	0.688026
ENSG00000148826	NKX6-2	0.0495397	0.688132
ENSG00000185551	NR2F2	-0.0261018	0.691277
ENSG00000177374	HIC1	-0.0398843	0.691832
ENSG00000169635	HIC2	0.0311835	0.691916
ENSG00000188321	ZNF559	-0.0454166	0.692074
ENSG00000161940	BCL6B	0.0542268	0.692648
ENSG00000118495	PLAGL1	0.0483873	0.695724
ENSG00000126368	NR1D1	-0.029638	0.696758
ENSG00000107187	LHX3	0.0391223	0.698092
ENSG00000123358	NR4A1	0.0732595	0.700643
ENSG00000186812	ZNF397	0.0401203	0.702256
ENSG00000160201	U2AF1	-0.013643	0.703104
ENSG00000136327	NKX2-8	-0.0403215	0.704177
ENSG00000102189	EEA1	0.0616192	0.706694
ENSG00000132604	TERF2	-0.0312273	0.706915
ENSG00000164093	PITX2	-0.0466381	0.709552
ENSG00000165462	PHOX2A	0.0495865	0.709672
ENSG00000100644	HIF1A	-0.0616223	0.713378
ENSG00000080603	SRCAP	-0.022008	0.713497
ENSG00000197870	PRB3	0.0490339	0.715567
ENSG00000054598	FOXC1	-0.040205	0.716498
ENSG00000173757	STAT5B	0.020412	0.717868
ENSG00000068323	TFE3	0.0151507	0.719704
ENSG00000063515	GSC2	0.0627367	0.722748
ENSG00000186918	ZNF395	0.0208872	0.723799
ENSG00000174586	ZNF497	0.03936	0.724438
ENSG00000140265	ZSCAN29	0.0294393	0.725073
ENSG00000181444	ZNF467	-0.0345057	0.725545
ENSG00000096696	DSP	-0.0282294	0.726841
ENSG00000176407	KCMF1	-0.0287585	0.728409
ENSG00000160961	ZNF333	-0.0275659	0.728453
ENSG00000168813	ZNF507	0.0411206	0.730071
ENSG00000184221	OLIG1	0.0444722	0.732117
ENSG00000156273	BACH1	-0.0296057	0.732666
ENSG00000176692	FOXC2	-0.0396179	0.733125
ENSG00000014824	SLC30A9	0.0535859	0.733423
ENSG00000163939	PBRM1	-0.0320304	0.734498
ENSG00000179922	ZNF784	0.0303726	0.736208
ENSG00000127081	ZNF484	0.0353014	0.73679
ENSG00000181220	ZNF746	0.0250242	0.736894
ENSG00000196409	ZNF658	-0.0277935	0.73753
ENSG00000196417	ZNF765	-0.0418862	0.738997
ENSG00000153266	FEZF2	0.0377948	0.739312
ENSG00000113196	HAND1	-0.0403118	0.740205
ENSG00000116035	VAX2	0.0397191	0.740887
ENSG00000152192	POU4F1	0.0408098	0.740985
ENSG00000105672	ETV2	0.0420526	0.741761
ENSG00000164631	ZNF12	0.0361534	0.741913
ENSG00000178177	LCORL	-0.0248433	0.741989
ENSG00000167395	ZNF646	0.0222901	0.743126
ENSG00000169951	ZNF764	-0.0258088	0.7448
ENSG00000112365	ZBTB24	0.0276213	0.747603
ENSG00000204366	ENSG00000204366	-0.0506432	0.748767
ENSG00000162924	REL	-0.0411621	0.749076
ENSG00000124440	HIF3A	-0.0338189	0.74989
ENSG00000130711	PRDM12	0.0394184	0.749909
ENSG00000169840	GSX1	-0.0350786	0.751448
ENSG00000101493	ZNF516	-0.0241027	0.751848
ENSG00000159556	ISL2	0.038754	0.752362
ENSG00000152784	PRDM8	-0.0257871	0.75491
ENSG00000004848	ARX	0.0362745	0.758664
ENSG00000196323	ZBTB44	-0.0317985	0.759227
ENSG00000196700	ZNF512B	-0.037257	0.76087
ENSG00000197841	ZNF181	-0.0173351	0.761088
ENSG00000186790	FOXE3	-0.0353892	0.761149
ENSG00000156150	ALX3	0.0407918	0.762111
ENSG00000118707	TGIF2	0.0284264	0.763093
ENSG00000106052	TAX1BP1	-0.0472425	0.764596
ENSG00000167034	NKX3-1	0.0253743	0.765379
ENSG00000083812	ZNF324	0.0254273	0.765707
ENSG00000184302	SIX6	0.0361906	0.766012
ENSG00000173976	RAX2	0.0436258	0.767539
ENSG00000179195	ZNF664	0.027384	0.769224
ENSG00000177494	ZBED2	-0.0389829	0.774954
ENSG00000133937	GSC	0.0386144	0.776463
ENSG00000130751	NPAS1	0.035675	0.778495
ENSG00000179943	FIZ1	0.0261011	0.779707
ENSG00000183900	FOXD1	-0.0287694	0.780674
ENSG00000177853	ZNF518A	-0.0401874	0.781395
ENSG00000136944	LMX1B	0.0262964	0.784667
ENSG00000139445	FOXN4	0.0283416	0.784874
ENSG00000171956	FOXB1	-0.0379025	0.787477
ENSG00000178804	H1FOO	0.0292672	0.78788
ENSG00000128714	HOXD13	0.0653584	0.788105
ENSG00000118217	ATF6	0.0306004	0.788992
ENSG00000115844	DLX2	0.0320269	0.791123
ENSG00000135625	EGR4	0.0379899	0.791845
ENSG00000178028	DMAP1	0.0141157	0.793569
ENSG00000087903	RFX2	0.0198216	0.794652
ENSG00000143373	ZNF687	0.00873625	0.797438
ENSG00000106546	AHR	0.0333456	0.799958
ENSG00000118412	CASP8AP2	0.0314184	0.800456
ENSG00000176083	ZNF683	0.0271328	0.801845
ENSG00000078900	TP73	0.0284099	0.803269
ENSG00000204624	PTCHD2	0.0265882	0.804521
ENSG00000101216	GMEB2	0.0179539	0.804733
ENSG00000063587	ZNF275	-0.0120161	0.805176
ENSG00000121903	ZSCAN20	-0.0161973	0.805704
ENSG00000069812	HES2	0.0307875	0.806169
ENSG00000187728	TCF24	-0.0253202	0.8068
ENSG00000109320	NFKB1	0.0287349	0.807783
ENSG00000113262	GRM6	0.0253468	0.80824
ENSG00000156127	BATF	0.0252384	0.810762
ENSG00000198783	ZNF830	-0.0241428	0.812212
ENSG00000204060	FOXO6	0.0287007	0.812449
ENSG00000141905	NFIC	0.0241112	0.814298
ENSG00000182568	SATB1	-0.0410436	0.817555
ENSG00000116819	TFAP2E	-0.0317476	0.817881
ENSG00000104903	LYL1	0.0277852	0.818835
ENSG00000197037	ZNF498	0.0143694	0.819075
ENSG00000177125	ZBTB34	0.0158969	0.821068
ENSG00000137185	ZNF193	-0.0154951	0.822402
ENSG00000135638	EMX1	0.0252882	0.823061
ENSG00000105127	AKAP8	0.00861242	0.823588
ENSG00000215397	SCRT2	0.0477367	0.824048
ENSG00000122592	HOXA7	0.0387943	0.824061
ENSG00000011590	ZBTB32	0.0267449	0.824794
ENSG00000169955	ZNF747	0.022813	0.825155
ENSG00000162676	GFI1	0.0211348	0.825585
ENSG00000198914	POU3F3	-0.0211786	0.827419
ENSG00000144852	NR1I2	0.0191146	0.827986
ENSG00000075891	PAX2	0.02182	0.828131
ENSG00000143190	POU2F1	-0.00770277	0.828829
ENSG00000105610	KLF1	-0.0299001	0.82924
ENSG00000101665	SMAD7	0.0149629	0.829636
ENSG00000100811	YY1	-0.0100046	0.829757
ENSG00000115297	TLX2	-0.0288353	0.830006
ENSG00000151615	POU4F2	0.0239522	0.831437
ENSG00000043355	ZIC2	0.0233429	0.832992
ENSG00000100722	ZC3H14	0.0268501	0.833993
ENSG00000166823	MESP1	0.0282138	0.835418
ENSG00000197483	ZNF628	0.0243236	0.83726
ENSG00000184486	POU3F2	0.0252536	0.837598
ENSG00000162419	GMEB1	0.0152304	0.83807
ENSG00000127903	ZNF835	0.0249045	0.83955
ENSG00000203883	SOX18	0.0225729	0.840109
ENSG00000189180	ZNF33A	-0.0241314	0.841538
ENSG00000163884	KLF15	0.0229989	0.845705
ENSG00000091009	RBM27	-0.0220049	0.846093
ENSG00000196456	ZNF775	0.0181717	0.846962
ENSG00000125618	PAX8	-0.0205974	0.847354
ENSG00000174279	EVX2	0.0231728	0.850706
ENSG00000205922	ONECUT3	-0.0201453	0.851742
ENSG00000178764	ZHX2	0.0140815	0.853858
ENSG00000204304	ENSG00000204304	0.0143846	0.855529
ENSG00000124664	SPDEF	0.0221671	0.856145
ENSG00000174332	GLIS1	-0.0223387	0.856344
ENSG00000186766	FOXI2	0.0215935	0.862135
ENSG00000125816	NKX2-4	0.0231307	0.862635
ENSG00000188779	SKOR1	0.0205728	0.863599
ENSG00000174595	KLF14	0.0198956	0.864729
ENSG00000122691	TWIST1	-0.0202549	0.864868
ENSG00000138136	LBX1	0.0242541	0.866195
ENSG00000163497	FEV	-0.0206746	0.868408
ENSG00000113761	ZNF346	0.00695305	0.871132
ENSG00000131668	BARX1	0.0182848	0.873129
ENSG00000136169	SETDB2	-0.0189476	0.87398
ENSG00000106852	LHX6	0.0180731	0.874188
ENSG00000159184	HOXB13	-0.0772385	0.874679
ENSG00000142611	PRDM16	0.0175291	0.875001
ENSG00000167394	ZNF668	0.0155201	0.875317
ENSG00000112238	PRDM13	0.0191402	0.876202
ENSG00000197114	ZGPAT	0.0131	0.877005
ENSG00000009307	CSDE1	0.0221087	0.87725
ENSG00000198753	PLXNB3	0.0168265	0.878874
ENSG00000170430	MGMT	-0.0124685	0.88132
ENSG00000188909	BSX	0.0202429	0.881438
ENSG00000176678	FOXL1	-0.014908	0.884626
ENSG00000170122	FOXD4	-0.018357	0.886121
ENSG00000130700	GATA5	0.0169066	0.88614
ENSG00000184677	ZBTB40	-0.00941186	0.888088
ENSG00000121454	LHX4	-0.0128541	0.888637
ENSG00000125878	TCF15	-0.0146684	0.889192
ENSG00000205903	ZNF316	0.0128882	0.889519
ENSG00000196576	PLXNB2	0.0135155	0.890614
ENSG00000146007	ZMAT2	-0.0169061	0.892619
ENSG00000112685	EXOC2	0.0117378	0.893655
ENSG00000128713	HOXD11	-0.0197186	0.894445
ENSG00000056586	RC3H2	0.0121904	0.895699
ENSG00000116809	ZBTB17	0.0119148	0.896907
ENSG00000126705	AHDC1	0.0117045	0.89701
ENSG00000179965	ZNF771	0.016254	0.897137
ENSG00000173545	ZNF622	0.0140116	0.898851
ENSG00000146414	SHPRH	-0.0125923	0.901098
ENSG00000005102	MEOX1	-0.0159504	0.901494
ENSG00000160710	ADAR	-0.0111569	0.902586
ENSG00000103199	ZNF500	0.013274	0.906034
ENSG00000029363	BCLAF1	0.0199123	0.906097
ENSG00000184937	WT1	0.0137319	0.906542
ENSG00000185668	POU3F1	0.0128814	0.909395
ENSG00000112658	SRF	-0.00839087	0.912875
ENSG00000145734	BDP1	0.0119162	0.914895
ENSG00000085274	MYNN	-0.013747	0.91608
ENSG00000104472	CHRAC1	0.00512352	0.916203
ENSG00000143006	DMRTB1	-0.0125892	0.91751
ENSG00000173825	TIGD3	0.0113989	0.926901
ENSG00000188013	ENSG00000188013	0.00941129	0.928339
ENSG00000065970	FOXJ2	0.00444412	0.929216
ENSG00000197587	DMBX1	-0.0102746	0.931117
ENSG00000174197	MGA	-0.00896972	0.93404
ENSG00000085644	ZNF213	0.00698687	0.93693
ENSG00000105939	ZC3HAV1	-0.00801027	0.938833
ENSG00000126603	GLIS2	-0.00896857	0.939541
ENSG00000168724	DNAJC21	0.0100835	0.940393
ENSG00000064489	ENSG00000064489	-0.0120346	0.940638
ENSG00000176887	SOX11	-0.00676801	0.941227
ENSG00000205869	KRTAP5-1	-0.00893986	0.943867
ENSG00000180828	BHLHE22	-0.00546575	0.945011
ENSG00000179528	LBX2	0.00709919	0.945061
ENSG00000137871	ZNF280D	-0.0100837	0.946898
ENSG00000164920	OSR2	-0.00967631	0.948224
ENSG00000109705	NKX3-2	0.00800827	0.948473
ENSG00000151514	SALL3	-0.00656111	0.952243
ENSG00000125492	BARHL1	-0.00669161	0.953671
ENSG00000215612	HMX1	-0.0068266	0.953703
ENSG00000182944	EWSR1	-0.00443638	0.95462
ENSG00000133250	ZNF414	0.00514613	0.955161
ENSG00000152439	ZNF773	-0.00529101	0.955602
ENSG00000122482	ZNF644	0.0057062	0.95597
ENSG00000105419	MEIS3P2	-0.00523722	0.958384
ENSG00000089902	RCOR1	-0.00370445	0.95985
ENSG00000165066	NKX6-3	-0.00629547	0.960162
ENSG00000136574	GATA4	0.00577159	0.960346
ENSG00000128709	HOXD9	0.00522641	0.960515
ENSG00000141644	MBD1	0.00175874	0.961664
ENSG00000059145	UNKL	-0.00518283	0.962158
ENSG00000171532	NEUROD2	-0.00620308	0.962654
ENSG00000120093	HOXB3	-0.00360724	0.963045
ENSG00000163064	EN1	-0.00545284	0.963977
ENSG00000173673	HES3	-0.00560611	0.964014
ENSG00000198026	ZNF335	0.00260609	0.965866
ENSG00000123268	ATF1	-0.00438949	0.965895
ENSG00000179772	FOXS1	0.00416252	0.968296
ENSG00000205899	BHLHA9	0.00582916	0.969989
ENSG00000187140	FOXD3	-0.00413303	0.972531
ENSG00000181135	ZNF707	-0.003002	0.9726
ENSG00000189190	ZNF600	-0.00402594	0.97449
ENSG00000166266	CUL5	-0.00452675	0.975882
ENSG00000185507	IRF7	0.002828	0.978613
ENSG00000102145	GATA1	0.0035918	0.978816
ENSG00000134595	SOX3	0.00284188	0.978942
ENSG00000185960	SHOX	0.00276943	0.979945
ENSG00000182903	ZNF721	-0.00421299	0.981025
ENSG00000184058	TBX1	0.00297572	0.98142
ENSG00000196189	SEMA4A	0.00125715	0.984681
ENSG00000186376	ZNF75D	0.000807277	0.988454
ENSG00000041988	THAP3	0.00118691	0.990558
ENSG00000088881	EBF4	-0.00120804	0.993088
ENSG00000123636	BAZ2B	0.000997742	0.993883
ENSG00000117505	DR1	0.000580641	0.994426
ENSG00000124097	HMGB1L1	0.00145754	0.994906
ENSG00000165606	DRGX	-0.000819309	0.995214
ENSG00000135148	TRAFD1	-0.000461763	0.995677
ENSG00000160224	AIRE	-0.000217589	0.998544
ENSG00000179111	HES7	0.000199379	0.99887
ENSG00000106689	LHX2	1.21578e-05	0.999916
