# Supplementary material for: A comprehensive look at transcription factor gene expression changes in colorectal adenomas
Source: BMC Cancer. 2014 Jan 29;14:46. doi: 10.1186/1471-2407-14-46 (PMC4078005; doi:10.1186/1471-2407-14-46)
Supplement: Additional file 6: Table S5 — Characteristics of the 80 colon cancer patients tested for DACH1 expression. [file 1471-2407-14-46-S6.xls]

## Sheet: Sheet1
Supplementary table 5. Characteristics of the 80 colon cancer patients tested for DACH1 expression.
Colon cancer no.	Stage ¶	Histologic grade ¶	Colon segment	Mismatch Repair
1	pT3, pN0, V1	G2	proximal colon	proficient
2	pT2, pN0	G2	cecum	proficient
3	pT2, pN1	G2	cecum	proficient
4	pT4, pN2, V1, L1	G3	cecum	proficient
5	pT3, pN0	G2	cecum	proficient
6	pT3, pN1	G2	cecum	proficient
7	pT4, pN2, M1, V1	G2	cecum	proficient
8	pT4, pN1	G3	cecum	proficient
9	pT2, pN0	G2	cecum/ascending	proficient
10	pT3, pN1	G2	ascending	proficient
11	pT3, pN0, L1	G2	ascending	proficient
12	pT3, N2, M1	G3	cecum	proficient
13	pT3, pN0	G2	cecum	proficient
14	pT1, pN0	G2	ascending	proficient
15	pT3, pN0, Mx, V1, L0	G2	hepatic flexure	proficient
16	pT4, pN2, M1	G3	ascending	proficient
17	pT4, pN2	G2	cecum	proficient
18	pT4, pN2	G3	cecum	proficient
19	pT3, pN0	G2	ascending	proficient
20	pT3, pN2	G3	ascending	proficient
21	pT1, pN0	G2	hepatic flexure	proficient
22	pT2, pN0	G2	cecum/ascending	proficient
23	pT4, pN1	G3	cecum	proficient
24	pT3, pN2	G2	ascending	proficient
25	pT1, pN0	G2	ascending	proficient
26	pT3, pN1	G2	ascending	proficient
27	pT2, pN1	G3	ascending	proficient
28	pT3, pN0	G2	ascending	proficient
29	pT3, pN1	G2-3	cecum	proficient
30	pT2, pN0	G2	cecum	proficient
31	pT3, pN0	G2	proximal colon	proficient
32	pT4, pN1, M1	G2	proximal colon	proficient
33	pT3, pN0	G2	cecum	proficient
34	pT3, pN1	G2	cecum/ascending	proficient
35	pT3, pN0	G1	ascending	proficient
36	pT3, pN0	G2	cecum	proficient
37	pT3, pN1	G2	proximal colon	proficient
38	pT3, pN1, M1	G3	cecum	proficient
39	pT3, pN1	G2	cecum/ascending	proficient
40	pT3, pN0	G2	hepatic flexure	proficient
41	pT3, pN0, L1	G3	proximal colon	deficient
42	pT4, pN0, L1	G3	proximal colon	deficient
43	pT3, pN1, L1	G3	cecum	deficient
44	pT3, pN0	G2	ascending	deficient
45	pT3, pN0	G3	proximal colon	deficient
46	pT3, pN1	G2-3	cecum	deficient
47	pT4, pN0	G3	proximal colon	deficient
48	pT3, pN0	G2	ascending	deficient
49	pT3, pN1	G2	proximal colon	deficient
50	pT4, pN1	G3	cecum	deficient
51	pT3, pN0	G2	proximal colon	deficient
52	pT3, p,N0	G3	ascending	deficient
53	pT4, pN0	G2	proximal colon	deficient
54	pT3, pN2	G3	cecum	deficient
55	pT3, pN2	G3	cecum	deficient
56	pT3, pN0	G2	hepatic flexure	deficient
57	pT4, pN0	G3	cecum	deficient
58	pT2, pN0	G2	cecum	deficient
59	pT3, pN0	G2	ascending	deficient
60	pT4, pN0	G2	ascending	deficient
61	pT3, pN0	G2	cecum	deficient
62	pT3, pN2	G2-3	cecum	deficient
63	pT4, pN2	G2	cecum	deficient
64	pT3, pN0	G3	ascending	deficient
65	pT3, pN0	G2	cecum	deficient
66	pT3, pN0	G3	hepatic flexure	deficient
67	pT4, pN2, M1	G3	ascending	deficient
68	pT2, pN0	G3	cecum	deficient
69	pT3, pN0	G3	cecum	deficient
70	pT3, pN0	G3	cecum	deficient
71	pT2, pN0	G2	hepatic flexure	deficient
72	pT1, pN0	G2	ascending	deficient
73	pT3, pN0	G3	cecum/ascending	deficient
74	pT4, pN0, M1	G3	cecum	deficient
75	pT3, pN0	G3	ascending	deficient
76	pT3, pN1	G2	cecum	deficient
77	pT4, pN0	G3	cecum	deficient
78	pT3, pN0	G3	cecum	deficient
79	pT3, pN0	G3	cecum	deficient
80	pT2, pN0	G1-2	hepatic flexure	deficient
¶ Cancer stage and histologic grade were reported according to Sobin LH, Wittekind C. TNM classification of malignant turnours. 6th ed. New York, NY: Wiley-Liss, 2002.
