# Supplementary material for: A comprehensive look at transcription factor gene expression changes in colorectal adenomas
Source: BMC Cancer. 2014 Jan 29;14:46. doi: 10.1186/1471-2407-14-46 (PMC4078005; doi:10.1186/1471-2407-14-46)
Supplement: Additional file 14: Table S7 — The 633 TF genes whose networks were enriched in genes displaying significant differential expression in carcinomas (MetaCore analysis). Genes are listed in order of descending z-scores. The 255 genes listed in bold-face type had z-scores of > 2. [file 1471-2407-14-46-S14.xlsx]

## Sheet: Tabelle1
Supplementary Table 7. The 633 TF genes whose networks were enriched in genes displaying significantly dysregulated expression in carcinomas (Metacore analysis: TF genes identified with the same procedure shown in Figure 1 for adenomas). Genes are listed in order of descending z-scores. Bold-face type: 255 TF genes with a z-score > 2.
TF gene	z-score
c-Myc	26.4
E2F1	19.31
E2F4	19.08
CREB1	17.37
ZNF143	15.14
FOXM1	14.58
CUX1 (p110)	13.57
NANOG	13.08
E2F3	12.84
YY1	12.21
p53	11.48
GRHL2	11.42
Oct-3/4	10.99
E2F2	10.41
SOX2	10.34
E2F8	10.06
C/EBP zeta	9.271
ESR1 (nuclear)	9.003
b-Myb	9
SP1	8.947
E2F7	8.539
RelA (p65 NF-kB subunit)	8.237
IRF4	8.053
YB-1	8.022
HSF1	7.823
E2F6	7.815
HIF1A	7.708
c-Jun	7.668
p63	7.377
ETS2	7.194
C/EBPbeta	6.833
EGR1	6.608
ETS1	6.525
TCF7L2 (TCF4)	6.512
KLF4	6.339
SP3	6.336
NFYB	6.253
ATF-3	6.138
N-Myc	6.133
HOXA9	6.082
EPAS1	5.972
AP-2A	5.91
XBP1	5.881
E2F5	5.864
MITF	5.798
NFYA	5.771
HSF2	5.66
PEA3	5.655
GABP alpha	5.549
POLR2A	5.541
RelB (NF-kB subunit)	5.33
FoxL2	5.309
ETV3	5.305
MAD	5.198
Androgen receptor	5.166
Elk-1	5.123
Fra-2	5.056
FLI1	4.998
SP4	4.981
THAP11	4.908
ATF-6 alpha (90kDa)	4.844
TFE3	4.71
HHEX (PRH)	4.709
JunD	4.682
NRF1	4.589
TITF1	4.546
OASIS	4.407
ZNF384	4.407
KLF11 (TIEG2)	4.39
OVOL2	4.31
CIZ1	4.31
hnRNP K	4.31
DVL-3	4.31
LIN-9	4.31
AF-10	4.31
SPBP	4.31
IL-2	4.31
TEF-1	4.278
c-Fos	4.276
FKHR	4.275
SOX18	4.235
PR (nuclear)	4.229
JunB	4.142
TEF-3	4.064
STAT3	4.001
ZNF217	3.975
c-Rel (NF-kB subunit)	3.967
JDP2	3.959
RUNX2	3.949
NF-kB1 (p50)	3.91
ZF5	3.846
MIZF	3.795
C/EBPalpha	3.757
OTX2	3.576
SOX4	3.562
Bcl-6	3.542
c-Jun/c-Jun	3.517
FBI-1 (Pokemon)	3.516
RBP-J kappa (CBF1)	3.514
Max	3.514
ESE3	3.382
SP7	3.382
SOX6	3.354
Kaiso	3.33
MafF	3.33
EGFR	3.33
Menin	3.33
GLIS1	3.329
HOXD10	3.329
TFAM	3.329
p21	3.329
PDIA3	3.284
GCR-alpha	3.227
SREBP2 (nuclear)	3.22
ETV6(TEL1)	3.217
BMAL1	3.193
p73	3.049
CBX7	3.047
KLP1	3.047
REXO4	3.047
TCEAL7	3.047
Hox-B6	3.047
CRP2	3.047
AF-9	3.047
RAD54B	3.047
HOXD12	3.047
DAXX	3.047
AHRR	3.047
BTF	3.047
SF3B1	3.047
POLR2G	3.047
FHL2	3.047
Parkin	3.047
CREST	3.047
PHF20	3.047
MLL5	3.047
CDK7	3.047
LHX8	3.047
SIX6	3.047
PLAC8	3.047
TFB2M	3.047
NRIF3	3.047
La protein	3.047
SIX5	3.047
LHX6	3.047
RSL1D1	3.047
SDF-1	3.047
NOTCH2	3.047
CDK9	3.047
PARP-2	3.047
STRA13	3.047
ZNF267	3.047
Ebp1	3.047
APA1	3.047
IRF2BP1	3.047
ING1	3.047
G9a	3.047
FOXJ2	3.047
TRRAP	3.047
LIN-54	3.047
BTG2	3.047
SIL	3.047
EYA1	3.047
SOX9	3.044
TCF7L1 (TCF3)	3.029
PROX1	3
ETV2	2.959
GLI-3R	2.959
Mxi1	2.959
CBP	2.959
CLOCK	2.927
Lef-1	2.925
ITF2	2.917
PPAR-gamma	2.83
HOXD13	2.817
FOXC2	2.817
KLF6	2.817
SMAD3	2.802
NF-kB2 (p52)	2.8
TBP	2.785
NPAS2	2.78
MEL1	2.78
WT1	2.778
CSDA	2.761
ELF4	2.761
ATF-2	2.747
CIC	2.741
p107	2.719
ID2	2.719
FUBP1	2.719
HB9	2.719
HOXC11	2.719
ZHX2	2.719
TARDBP (TDP43)	2.719
ZNF24 (ZNF191)	2.719
FOXP2	2.679
ATF-4	2.676
ERR2	2.674
PDEF	2.652
KLF8	2.652
BTEB1	2.652
VDR	2.625
BARX2	2.587
FOXC1	2.587
SOX3	2.587
SMAD2	2.533
CHD7	2.527
SOX11	2.527
ER81	2.527
SP2	2.518
DEC1 (Stra13)	2.503
AP-4	2.443
PRDM14	2.442
LXR-alpha	2.44
ERM	2.381
Elk-3	2.381
NFIC	2.329
NFIX	2.3
PPAR-alpha	2.294
UBF	2.285
TLE3	2.285
NFAT-90	2.285
Rad21	2.285
EED	2.285
Tip60	2.285
ERF	2.285
BMAL2	2.285
CITED2	2.285
HOXA1	2.285
FosB	2.25
ERG	2.201
CUX1	2.194
TCF7 (TCF1)	2.194
USF2	2.185
Miz-1	2.183
PAX8	2.181
SOX5	2.18
DBP	2.176
HBP1	2.165
PYGO2	2.165
GATA-2	2.146
BACH1	2.14
NF-AT2(NFATC1)	2.123
KLF5	2.118
hASH1	2.113
Fra-1	2.076
STAT1	2.073
TIEG1	2.063
PRDM5	2.056
HOXB4	2.054
ROR-alpha	2.045
ChREBP	2.042
HEY1	2.042
NUR77	2.042
Evi-1	2.009
Elk-4	1.995
HIC1	1.965
HIVEP1 (PRDII-BF1)	1.952
OC-2	1.952
SOX7	1.952
NF-AT5	1.946
HSF4	1.946
TFIIB	1.94
DDX17	1.923
TIF1-beta	1.923
MTB-Zf	1.923
Neogenin	1.923
SREBP2 precursor	1.923
JIP-1	1.923
TWIST2	1.923
ATF-6 beta	1.923
NKRF	1.923
ZNF76	1.923
GMEB2	1.923
DP2	1.923
ZNF804A	1.923
Lactoferrin	1.923
irlB	1.923
PMX2	1.923
HOXA3	1.923
FR-alpha	1.923
GMEB1	1.923
THAP1	1.923
ZBED1	1.923
SNIP1	1.923
FOXN4	1.923
SALL2	1.923
Nkx2.8	1.923
HIVEP2	1.923
RFXANK	1.923
HDAC1	1.923
TIA-1	1.923
DAX1	1.922
NF-kB p50/p50	1.907
ZIC3	1.901
SOX17	1.89
GATA-1	1.873
NF-kB p65/p65	1.838
TFII-I	1.827
HoxC13	1.787
Sry	1.786
Pitx2	1.786
ESR2	1.77
TBX3	1.757
LXR-beta	1.735
NF-kB1 (p105)	1.725
TAL1	1.711
SLUG	1.691
TFIID 31 kDa subunit	1.684
STOX1	1.684
Vax2	1.684
HOXB3	1.684
TAF3	1.684
NRF3	1.684
FOXK2 (ILF1-4)	1.684
GLI-1	1.65
TR4	1.641
HNF6	1.641
TEF-4	1.626
MafK	1.626
SMAD4	1.605
COUP-TFII	1.596
Oct-1	1.581
FOXO3A	1.581
SALL4	1.574
CSX (Nkx2.5)	1.562
FOXE1	1.552
GATA-3	1.501
FOXP3	1.486
POU4F2	1.479
LYL1	1.479
Eomesodermin	1.479
AF5q31	1.459
HOXC8	1.459
MLX	1.459
NF-kB2 (p100)	1.459
Bcl-3	1.459
ZNF145	1.454
TBX5	1.452
PPAR-beta(delta)	1.447
TWIST1	1.447
NF-E2 (45 kDa)	1.439
MEF2C	1.436
MYOD	1.427
STAT5B	1.382
AKNA	1.38
Mixl1	1.38
FEZF2	1.38
TBP-like (TRF2)	1.38
SHOX2	1.38
FoxD1	1.38
HOX11	1.38
POU4F3	1.38
ELF2	1.38
FIP200	1.38
ErbB3	1.38
HOXD3	1.38
PAX9	1.38
SIX2	1.38
KILLIN	1.38
HOXB5	1.38
E4F1	1.38
ENO1	1.38
YAP1 (YAp65)	1.38
Glis2	1.38
SMAR1	1.38
TFIIE, alpha subunit	1.38
CNBP	1.38
FOXO6	1.38
ZFX	1.38
LBP-1B	1.38
TAF1	1.368
ELF3	1.368
PU.1	1.351
Rb protein	1.344
DACH1	1.266
MafA	1.266
cKrox	1.266
HOXA5	1.266
HMGB1	1.266
Nkx6.1	1.266
RREB1	1.266
PAX3	1.263
DLX5	1.242
NFIA	1.209
TFCP2	1.205
KLF2	1.205
ZNF306	1.205
EKLF1	1.154
SATB1	1.149
GCR-beta	1.149
CDX2	1.147
TFEB	1.128
ZNF281	1.128
CREB-H	1.103
HMGA2	1.103
USF1	1.097
Oct-6	1.097
BORIS	1.097
EBF2	1.097
ZNF652	1.097
ZNF161	1.097
NK31	1.075
TCF8	1.057
TR-alpha	1.045
HCF1	1.031
CREB3L2	1.031
HOXA11	1.031
ATF-7	1.031
IRX1	1.031
DP1	1.031
p300	1.031
SALL-1	1.031
LBX1	1.031
MLXIP	1.031
HOXB8	1.031
Phox1 (PRRX1)	1.031
TBR1	1.031
OVOL1	1.031
JARID2	1.031
MTF-2	1.031
C/EBPdelta	1.001
GLI-2	0.9991
RUNX3	0.9991
FOXK1	0.996
HES1	0.996
NRF2	0.9694
MeCP2	0.9472
Ikaros	0.8954
NFIB	0.8936
Islet-1	0.893
ZNF202	0.893
CTIP2	0.893
SMAD1	0.8852
AML1 (RUNX1)	0.8738
PAX7	0.8184
HOXA2	0.8155
STAT6	0.808
LRH1	0.802
Brca1	0.797
OLIG1	0.7758
SMAD7	0.7758
TAFII70	0.7758
TAF4 (TAFII130)	0.7758
LMO2	0.7758
HMG2	0.7758
NRB54	0.7758
ZBRK1	0.7758
AP-2E	0.7758
TEF-5	0.7758
ELF1	0.7571
SIX1	0.7404
KLF15	0.7404
HNF3-alpha	0.7394
CTCF	0.7207
CREAM1	0.6893
GFI1B	0.6893
LBP9	0.6893
ZNF148	0.6536
NRL	0.6502
ARNT	0.6502
IRF1	0.6469
C/EBPgamma	0.6199
SNAIL1	0.6136
AHR	0.6042
DLX2	0.5765
FEV	0.5742
Mesogenin 1	0.5742
Paraxis	0.5742
HOXB9	0.5742
TBX20	0.5742
HOXB1	0.5742
GCMA	0.5742
Aiolos	0.5742
Beta-catenin	0.5742
STAT5A	0.5588
BLIMP1 (PRDI-BF1)	0.5422
MSX1	0.5379
MTF-1	0.5379
RARgamma	0.4928
MYOG	0.4761
FXR	0.4758
DLX4 (BP1)	0.4722
GABP beta1	0.4722
RFX5	0.4722
ROR-gamma	0.4722
DLX3	0.4722
NF-AT1(NFATC2)	0.4619
FOXD3	0.4595
ZNF206	0.4595
TBX1	0.4076
ASH2	0.4076
TAF12	0.4076
WHN	0.4076
HOXB7	0.4076
AF-4	0.4076
CREB3	0.4076
SIX3	0.4076
IKZF4	0.4076
SIM2	0.4076
NXF	0.4076
hnRNP A1	0.4076
GRHL3	0.4076
MAZ	0.4022
SREBP1 precursor	0.3846
C/EBPepsilon	0.3846
SHP	0.3751
MAFG	0.3751
SMAD9 (SMAD8)	0.3751
BETA3	0.3751
PBX1	0.3721
TR-beta1	0.3453
c-Maf	0.341
IRF9	0.2843
Pitx1	0.2843
KLF13	0.2652
TFIIS	0.2652
PAX4	0.2652
Basonuclin	0.2652
TAF5	0.2652
BRG1	0.2652
RARalpha	0.2564
GFI-1	0.2236
REV-ERBalpha	0.2236
CDX1	0.2236
RFX1	0.1773
REX1	0.1773
TCF12	0.1674
ERR3	0.1613
SOX1	0.1407
TFIID 30 kDa subunit	0.1407
HAND2	0.1407
FOXF1	0.1407
REV-ERB-BETA	0.1407
TLX3	0.1407
ERR1	0.1189
SRF	0.1022
SIP1 (ZFHX1B)	0.04193
ATF-1	0.03002
FAST-1/2	0.02964
IRF6	0.02964
SIX4	0.02964
NCOA2 (GRIP1/TIF2)	0.02964
EBF	-0.02645
GATA-4	-0.03646
IRF7	-0.06636
ATH1	-0.06636
NOTCH1 (NICD)	-0.0707
HOXA13	-0.0707
HFH3	-0.0707
ATF-5	-0.0707
EAR2	-0.0707
Nac1	-0.0707
COUP-TFI	-0.07644
ZNF42 (MZF1)	-0.09304
HEY2	-0.1
TGIF	-0.1
NFYC	-0.1
RXRA	-0.1201
NF-AT3(NFATC4)	-0.1225
Neurogenin 2	-0.1624
FKHL1	-0.1624
MESP1	-0.1624
Securin	-0.1663
CREM (activators)	-0.2003
STAT2	-0.2122
IRF5	-0.23
AEBP1	-0.2353
IRF3	-0.2353
HNF1-beta	-0.2425
PBX2	-0.2471
NOR1	-0.2471
GCNF	-0.2471
MCR	-0.2471
MAD3	-0.2471
DEC2	-0.2471
LMX1B	-0.2471
HNF3-beta	-0.2598
PAX6	-0.2758
NURR1	-0.2815
CBF beta	-0.2815
ELF5	-0.2908
MafB	-0.2908
GLI-3	-0.2908
PTF1-p48	-0.3259
TBX2	-0.3259
PEG3	-0.3259
TRPS1	-0.3259
PAX2	-0.3496
HNF1-alpha	-0.374
NFE2L1	-0.3996
NF-AT4(NFATC3)	-0.4282
BACH2	-0.461
MSX-2	-0.469
HNF3-gamma	-0.469
PLU-1	-0.469
SMAD5	-0.479
Pdx-1 (IPF1)	-0.522
EGR3	-0.5346
SF1	-0.6139
Oct-2	-0.6151
HOXA10	-0.6151
PUR-alpha	-0.6563
POU4F1	-0.6563
NUP98	-0.6563
T brachyury protein	-0.7334
MEIS1	-0.7334
PIT1	-0.7563
PAX5	-0.7574
NeuroD1 (NDF1)	-0.7638
T-bet	-0.7735
HNF4-alpha	-0.7892
POU3F2 (BRN2)	-0.8303
E2A	-0.8347
GATA-6	-0.8347
KLF3	-0.8704
PXR	-0.887
HOXC6	-0.9191
E4BP4	-0.9266
AP-2B	-0.9662
GATA-5	-1.012
ARX	-1.012
MEF2A	-1.038
DMRT1	-1.048
FOXP1	-1.056
EGR2 (Krox20)	-1.07
AP-2C	-1.086
IRF2	-1.102
RARbeta	-1.182
IRF8	-1.193
CREM (repressors)	-1.476
LHX2	-2.905
NRSF	-2.961
